# Supplementary material for: Enhanced B7-H4 expression in gliomas with low PD-L1 expression identifies super-cold tumors
Source: PubMed Central journal article supplement — J Immunother Cancer. 2020 May 25;8(1):e000154. doi: 10.1136/jitc-2019-000154 (PMC7253052; doi:10.1136/jitc-2019-000154), 2020-05-25
Supplement: jitc-2019-000154supp003.pdf [file jitc-2019-000154supp003.pdf]

## Additional file 1: Supplementary Figures

### Article Title:

Enhanced B7-H4 expression in gliomas with low PD-L1 expression identifies super-cold tumors

### Authors:

Di Chen<sup>1</sup>, Gaopeng Li<sup>2</sup>, Chunxia Ji<sup>3</sup>, Qiqi Lu<sup>3</sup>, Ying Qi<sup>1</sup>, Chao Tang<sup>1,3</sup>, Ji Xiong<sup>4</sup>, Jian Hu<sup>5</sup>, Fatma Betul Aksoy Yasar<sup>5</sup>, Yan Zhang<sup>2</sup>, Dave S.B. Hoon<sup>6</sup>, Yu Yao<sup>1</sup>, Liangfu Zhou<sup>1,3</sup>

### Affiliations:

- 1 Department of Neurosurgery, Huashan hospital, Fudan University, Shanghai, China
- 2 Shenzhen Key Laboratory of Marine Bioresources and Ecology, Brain Disease and Big Data Research Institute, College of Life Sciences & and Oceanography, Shenzhen University, Shenzhen, Guangdong, China
- 3 Neurosurgical Immunology Laboratory, Neurosurgical Institute of Fudan University, Shanghai, China
- 4 Department of Pathology, Huashan hospital, Fudan University, Shanghai, China
- 5 Department of Cancer Biology, University of Texas MD Anderson Cancer Center, Houston, TX, USA
- 6 Department of Translational Molecular Medicine, John Wayne Cancer Institute, Providence Health Systems, Santa Monica, CA, USA

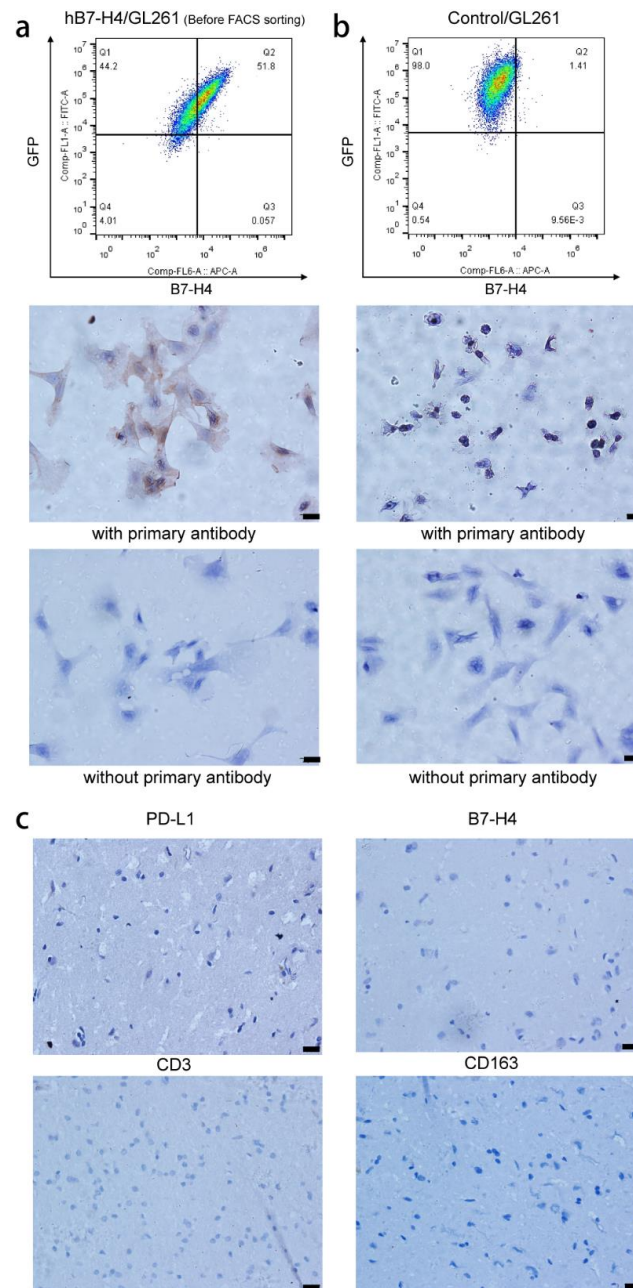

**Fig. S1.** Quality control slides for antibodies used in IHC. Flow cytometry (B7-H4 Ab, clone#2319B, R&D Systems) and IHC (B7-H4 Ab, ab209242, Abcam) for GL261 cells transfected with human B7-H4 gene **(a)**. Flow cytometry and IHC for GL261 cells transfected with an empty vector **(b)**. IHC in normal brain tissues **(c)**. Magnification, 40x objective; Bar, 20um.

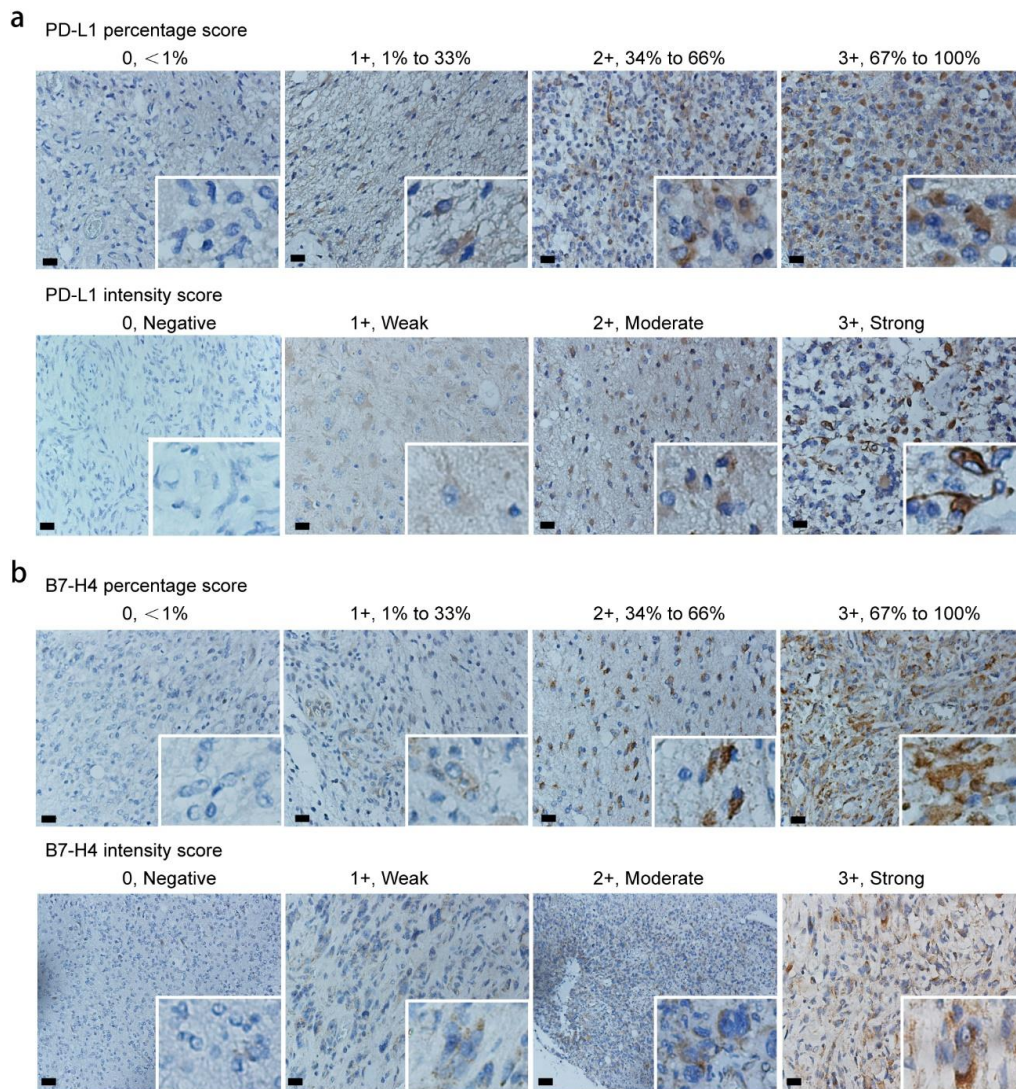

**Fig. S2.** Representative specimens demonstrating varying IHC scores of PD-L1 and B7-H4. Percentage and intensity score in PD-L1 staining (**a**). Percentage and intensity score in B7-H4 staining (**b**). Magnification, 40x objective; Bar, 20um.

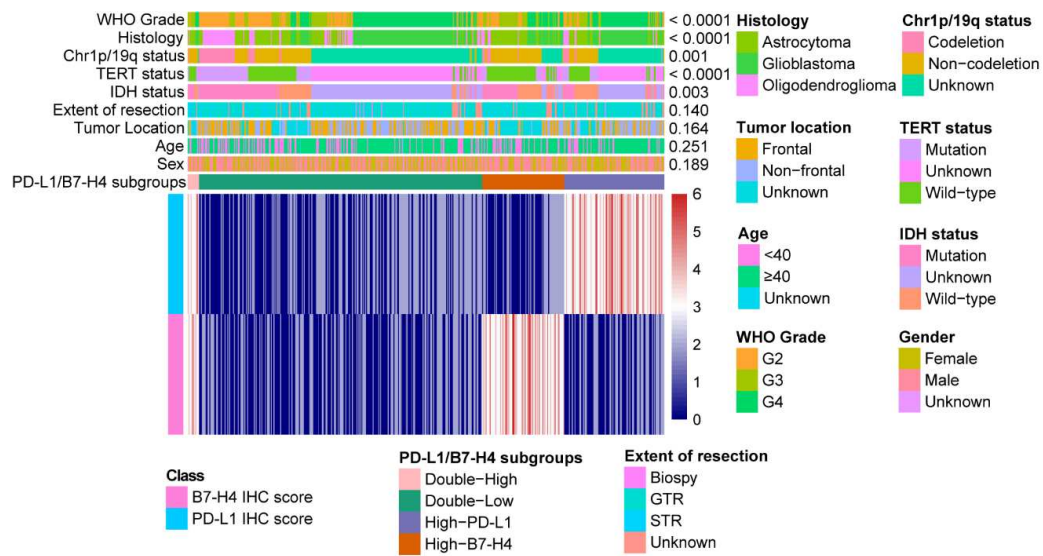

**Fig. S3.** Distributions of different clinicopathologic parameters in PD-L1/B7-H4 subgroups (examined with Fisher's exact test).

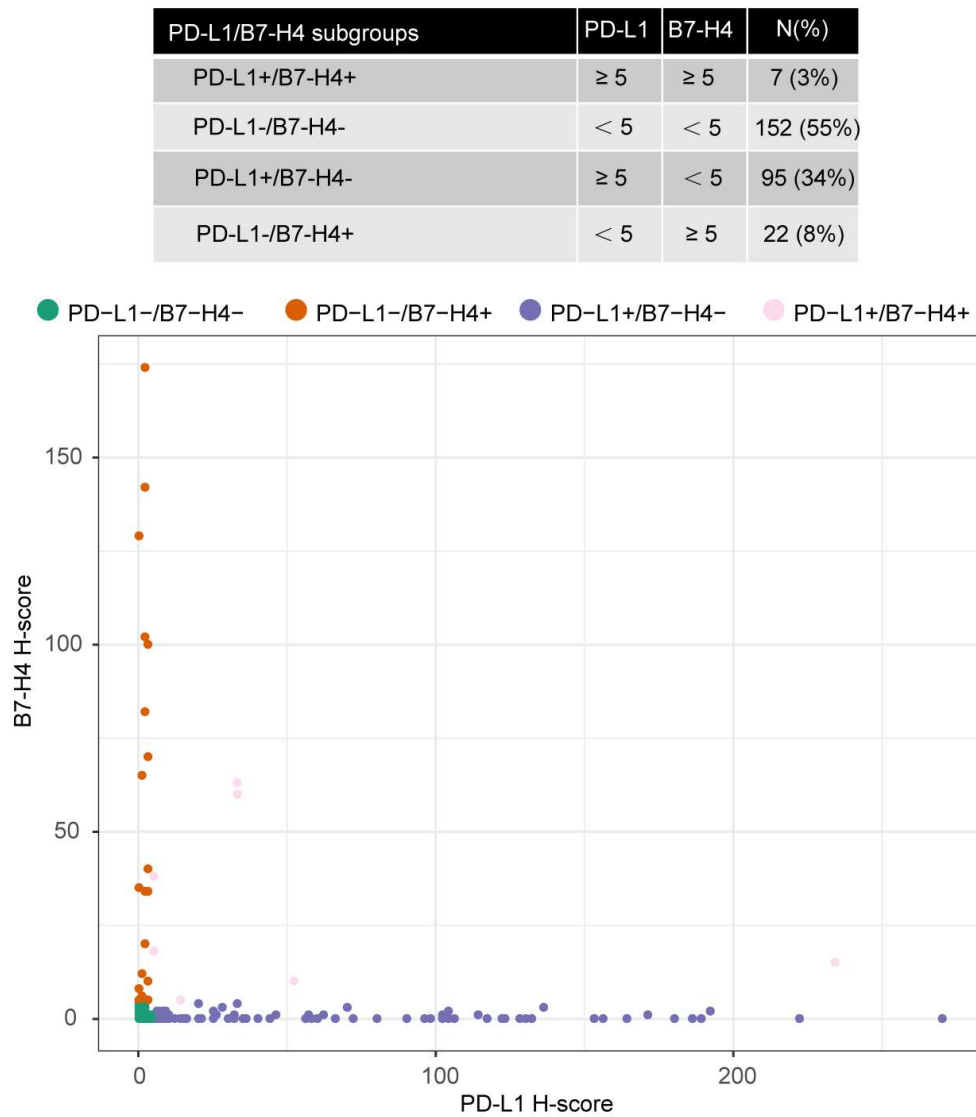

**Fig. S4.** Correlation between PD-L1 and B7-H4 expression (cutoff of H-score = 5).

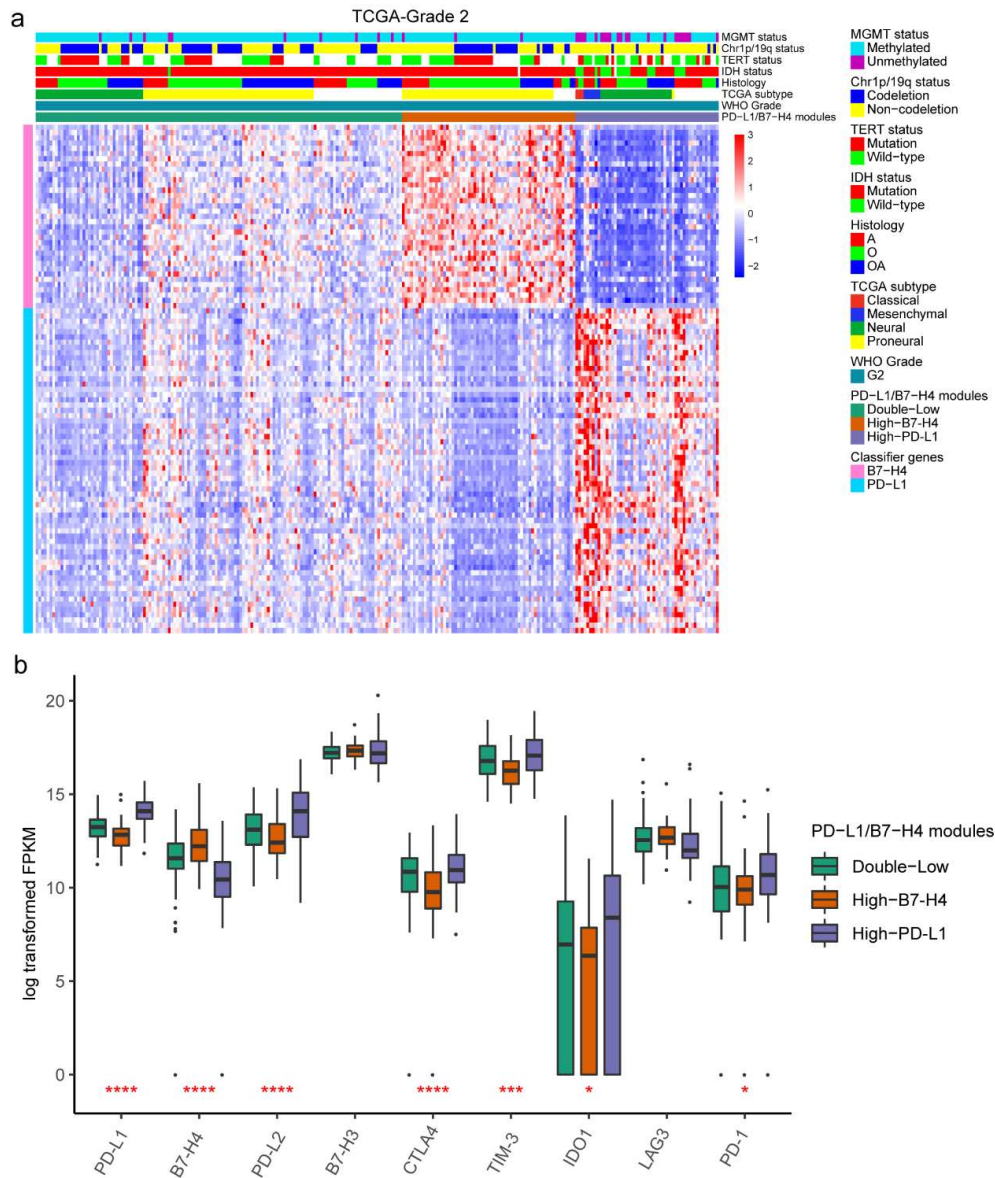

**Fig. S5.** Gene co-expression modules in the grade 2 gliomas from TCGA dataset showed mutually exclusive expression profiles. Gene co-expression modules using PD-L1/B7-H4 classifier genes (a). mRNA expression distribution of estimable checkpoint molecules among PD-L1/B7-H4 modules, including PD-L1 and B7-H4 (b).

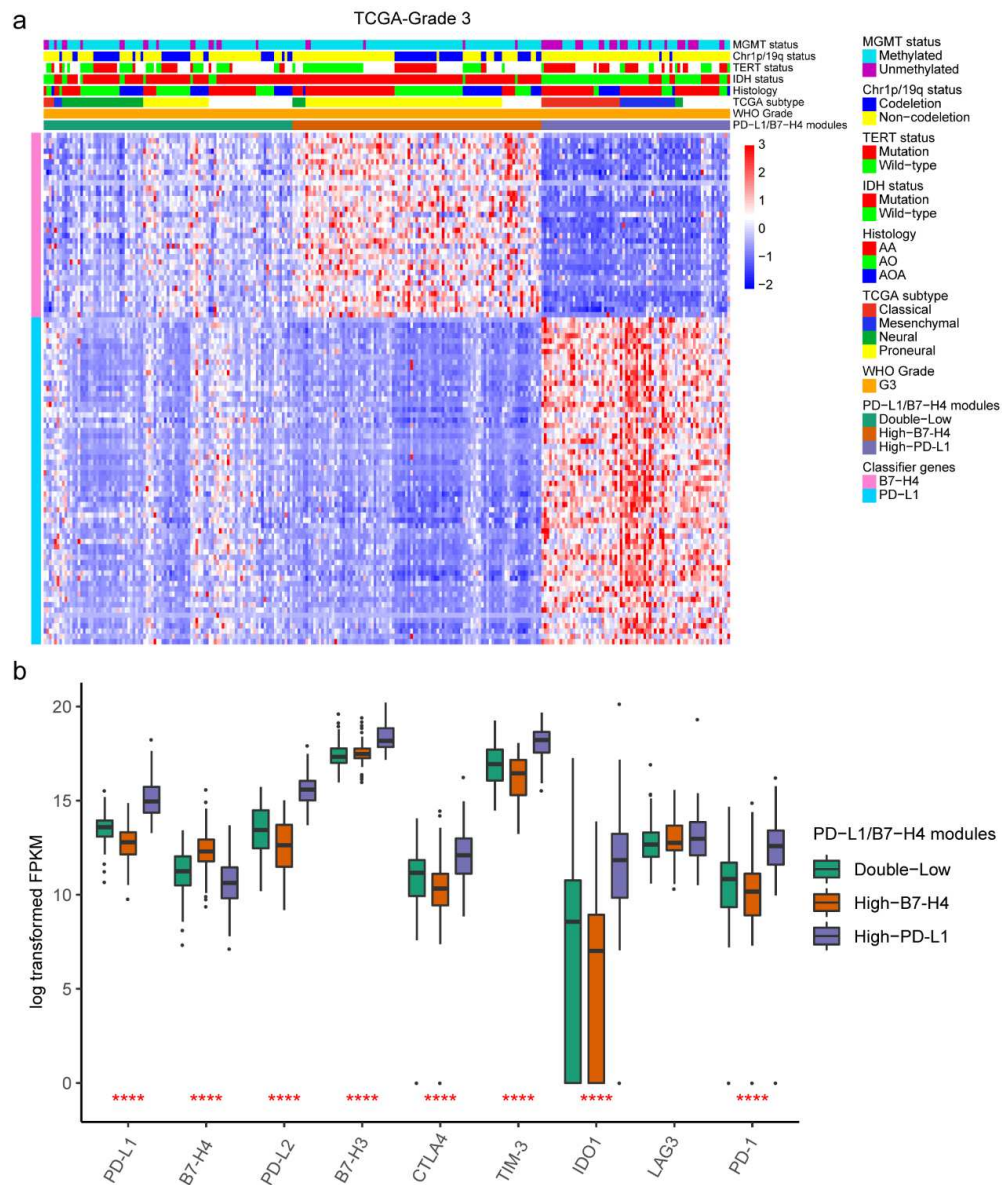

**Fig. S6.** Gene co-expression modules in the grade 3 gliomas from TCGA dataset showed mutually exclusive expression profiles. Gene co-expression modules using PD-L1/B7-H4 classifier genes **(a)**. mRNA expression distribution of estimable checkpoint molecules among PD-L1/B7-H4 modules, including PD-L1 and B7-H4 **(b)**.

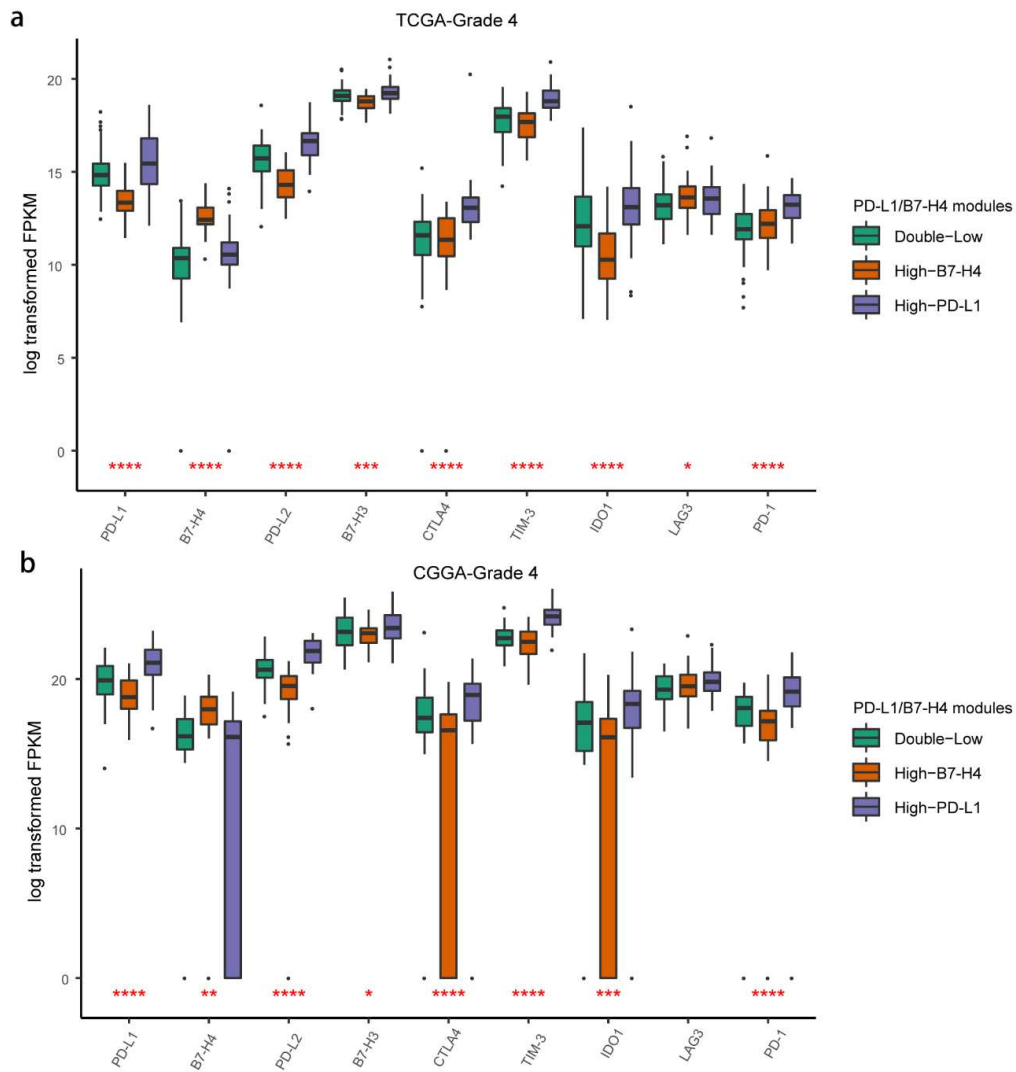

**Fig. S7.** mRNA expression distribution of estimable checkpoint molecules among PD-L1/B7-H4 modules in grade 4 gliomas from RNA-seq datasets. Grade 4 gliomas in TCGA dataset (**a**). Grade 4 gliomas in CGGA dataset (**b**).



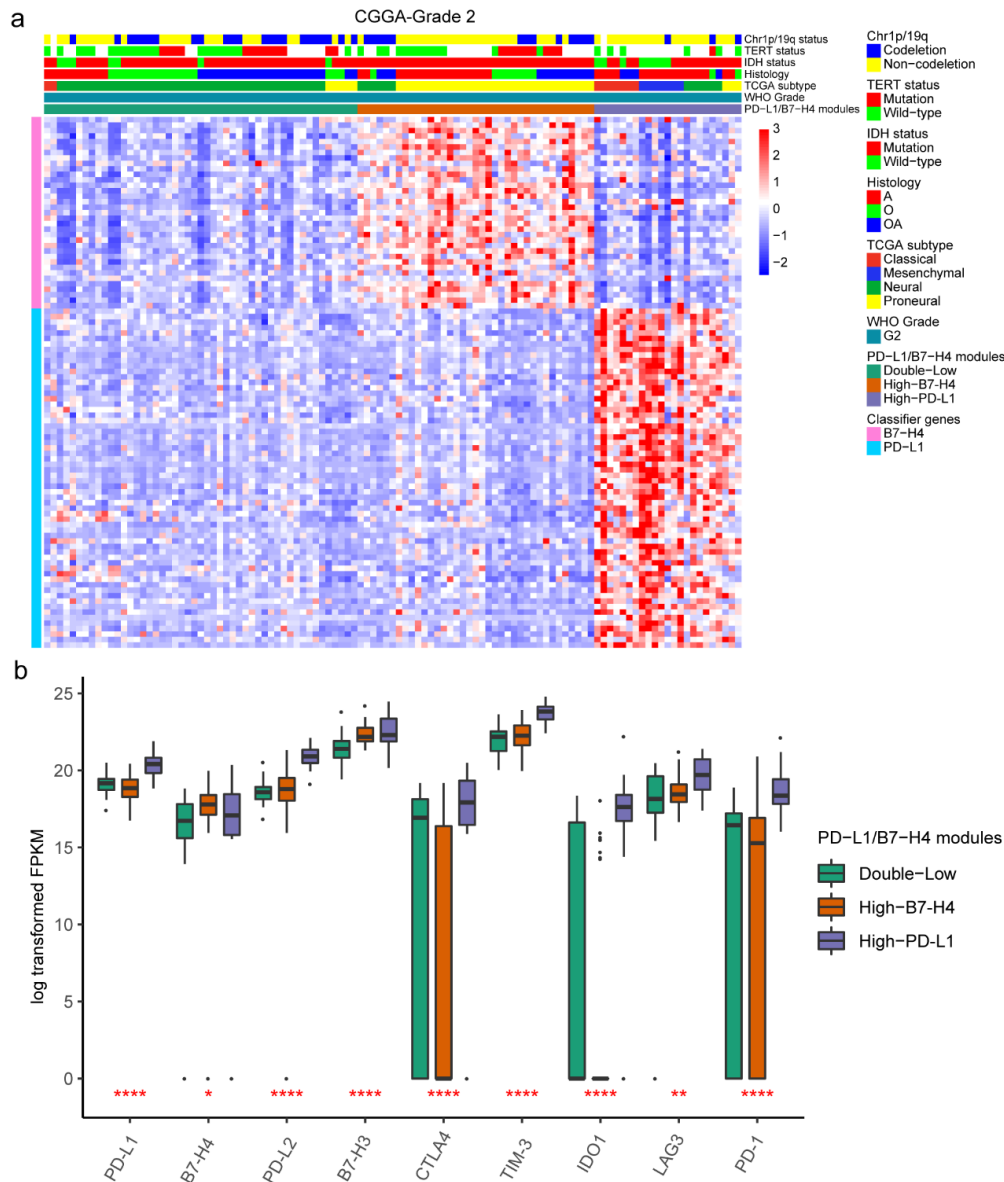

**Fig. S8.** Gene co-expression modules in the grade 2 gliomas from CGGA dataset showed mutually exclusive expression profiles. Gene co-expression modules using PD-L1/B7-H4 classifier genes (a). mRNA expression distribution of estimable checkpoint molecules among PD-L1/B7-H4 modules, including PD-L1 and B7-H4 (b).

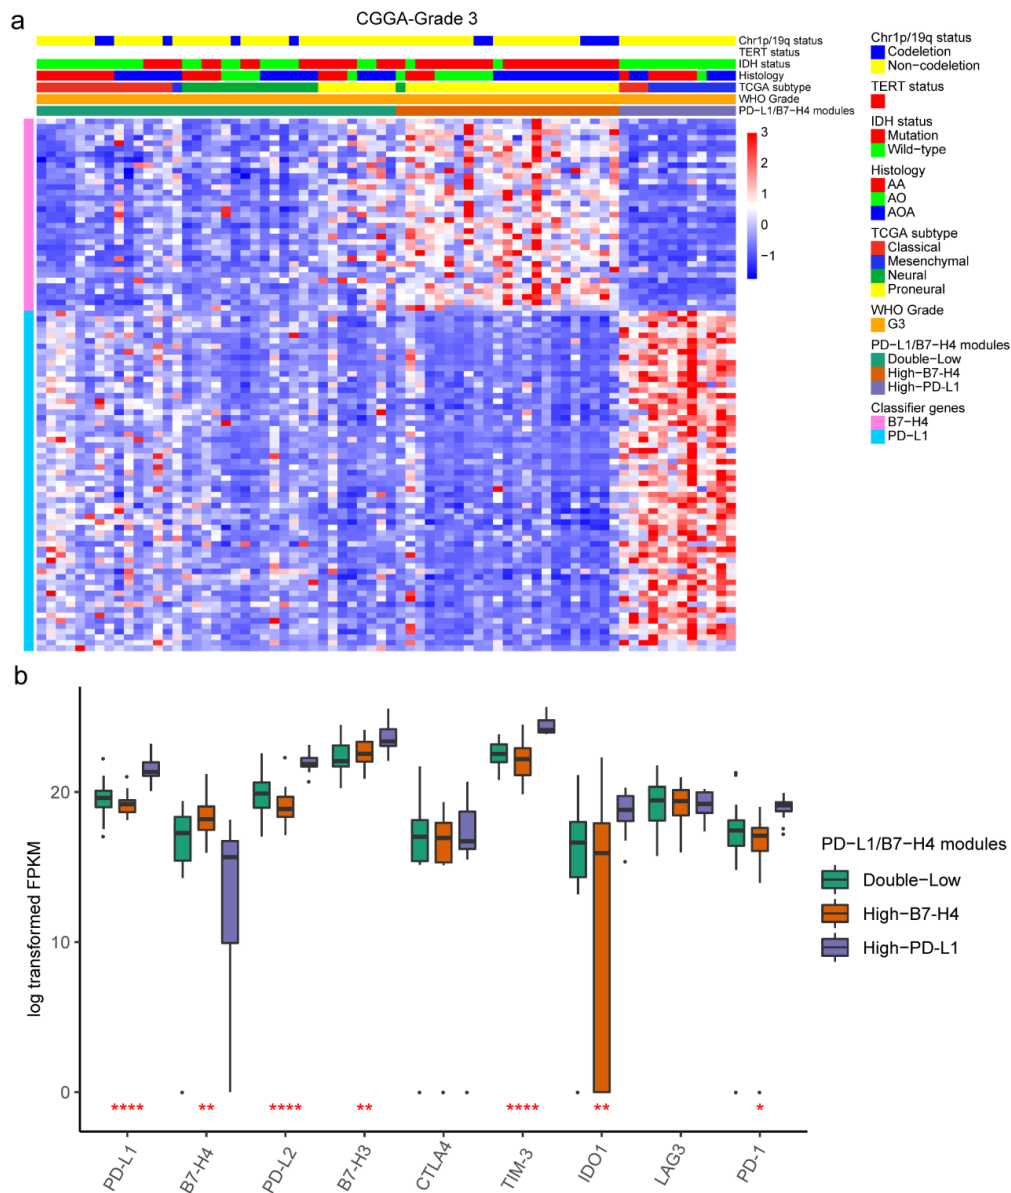

**Fig. S9.** Gene co-expression modules in the grade 3 gliomas from CGGA dataset showed mutually exclusive expression profiles. Gene co-expression modules using PD-L1/B7-H4 classifier genes (**a**). mRNA expression distribution of estimable checkpoint molecules among PD-L1/B7-H4 modules, including PD-L1 and B7-H4 (**b**).

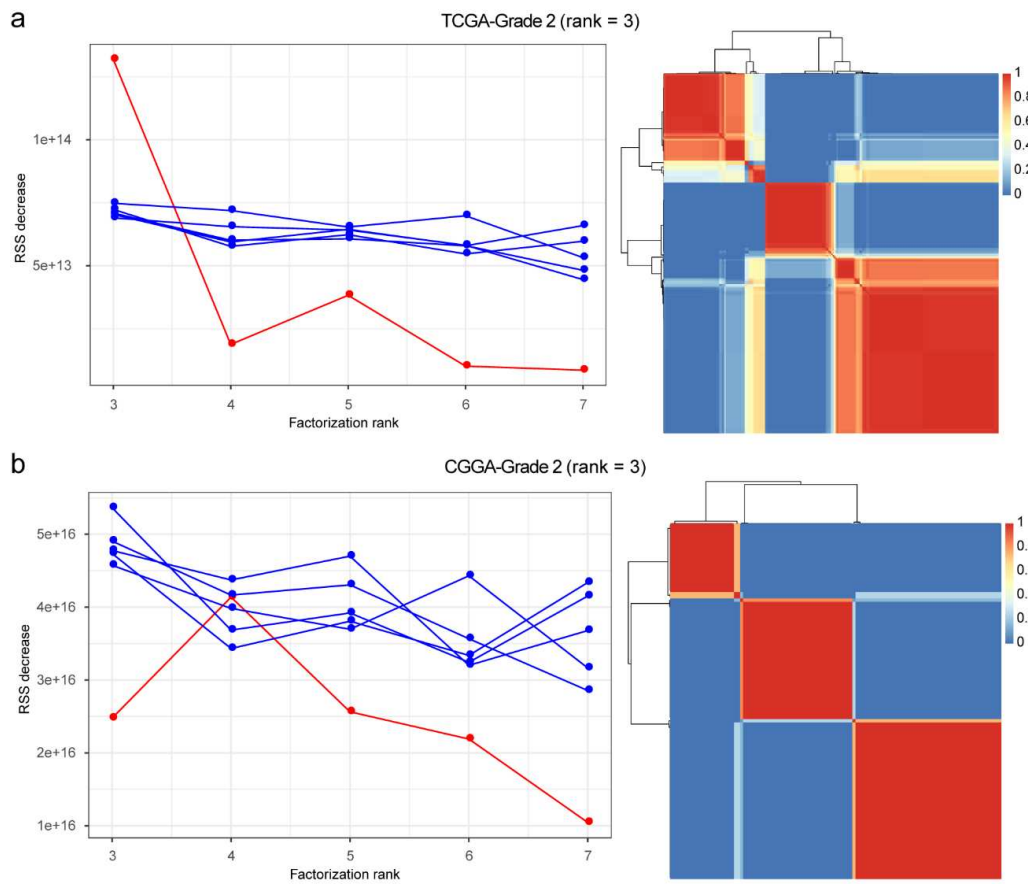

**Fig. S10.** Identification of PD-L1/B7-H4 modules in grade 2 gliomas from RNA-seq datasets. TCGA dataset (rank=3) **(a)**. CGGA dataset (rank=3) **(b)**.

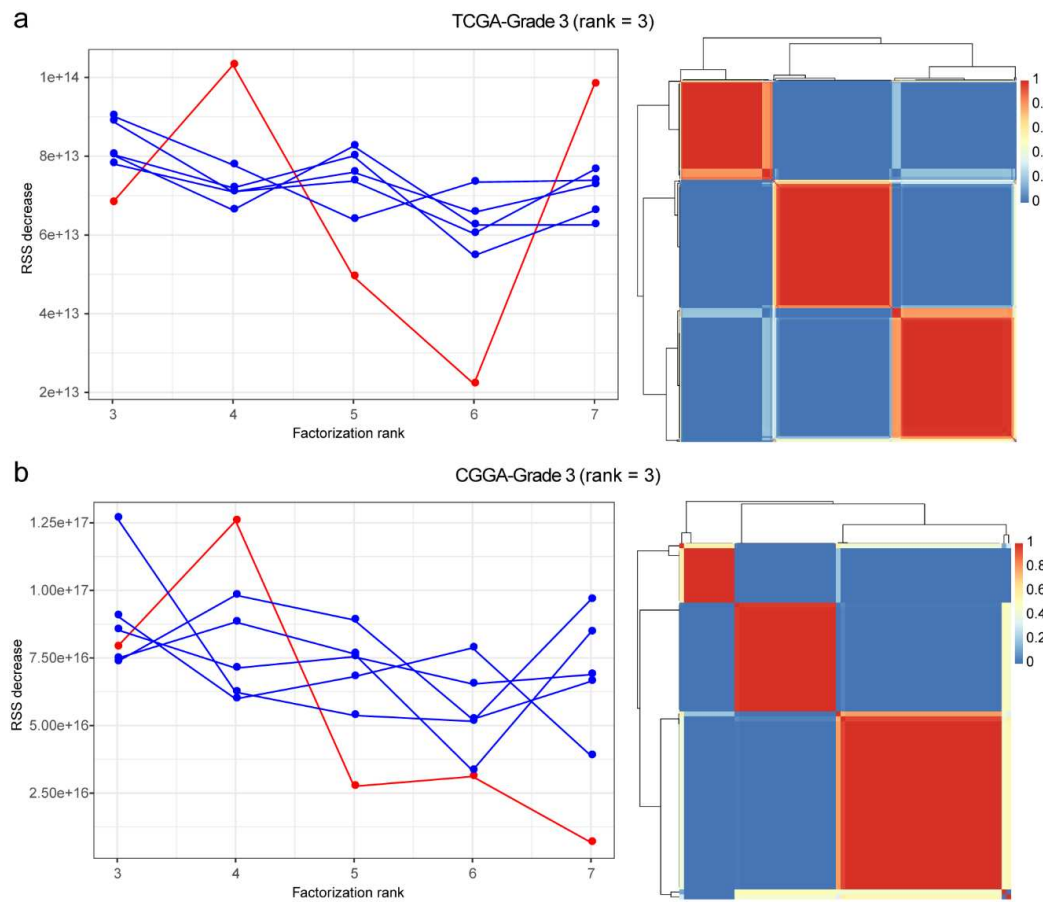

**Fig. S11.** Identification of PD-L1/B7-H4 modules in grade 3 gliomas from RNA-seq datasets. TCGA dataset (rank=3) **(a)**. CGGA dataset (rank=3) **(b)**.

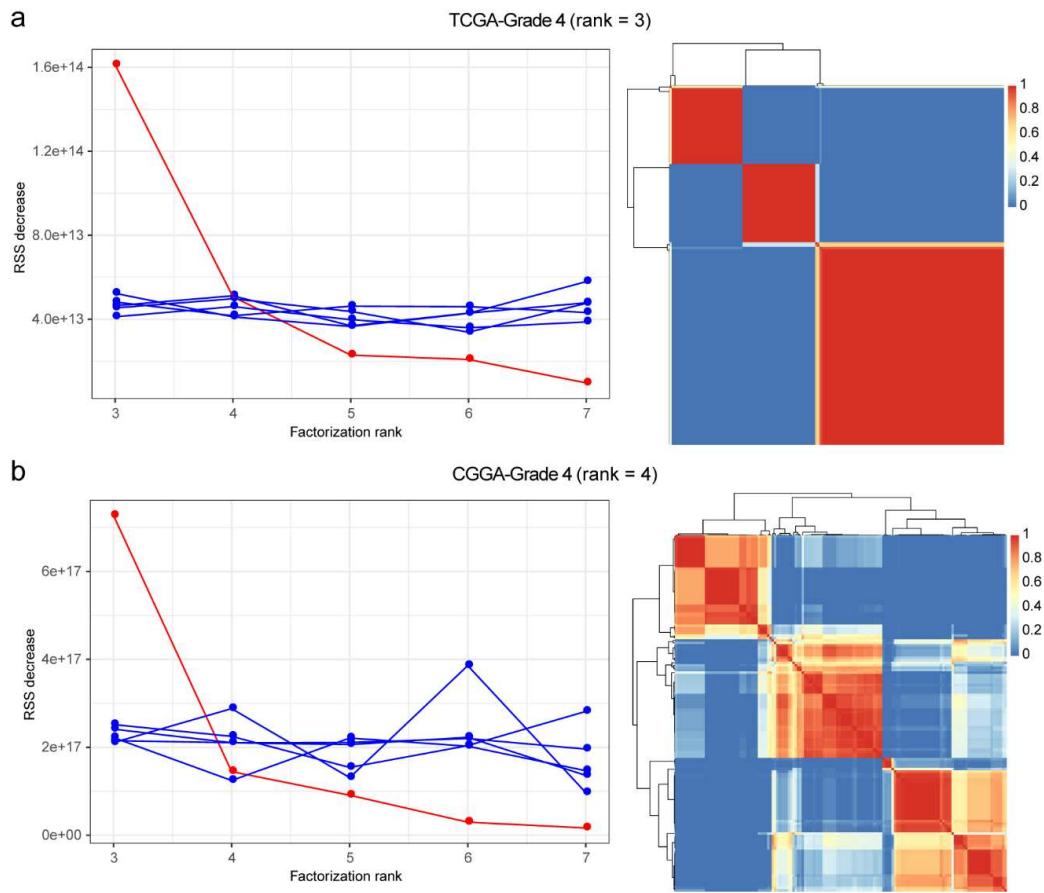

**Fig. S12.** Identification of PD-L1/B7-H4 modules in grade 4 gliomas from RNA-seq datasets. TCGA dataset (rank=3) **(a)**. CGGA dataset (rank=4) **(b)**.

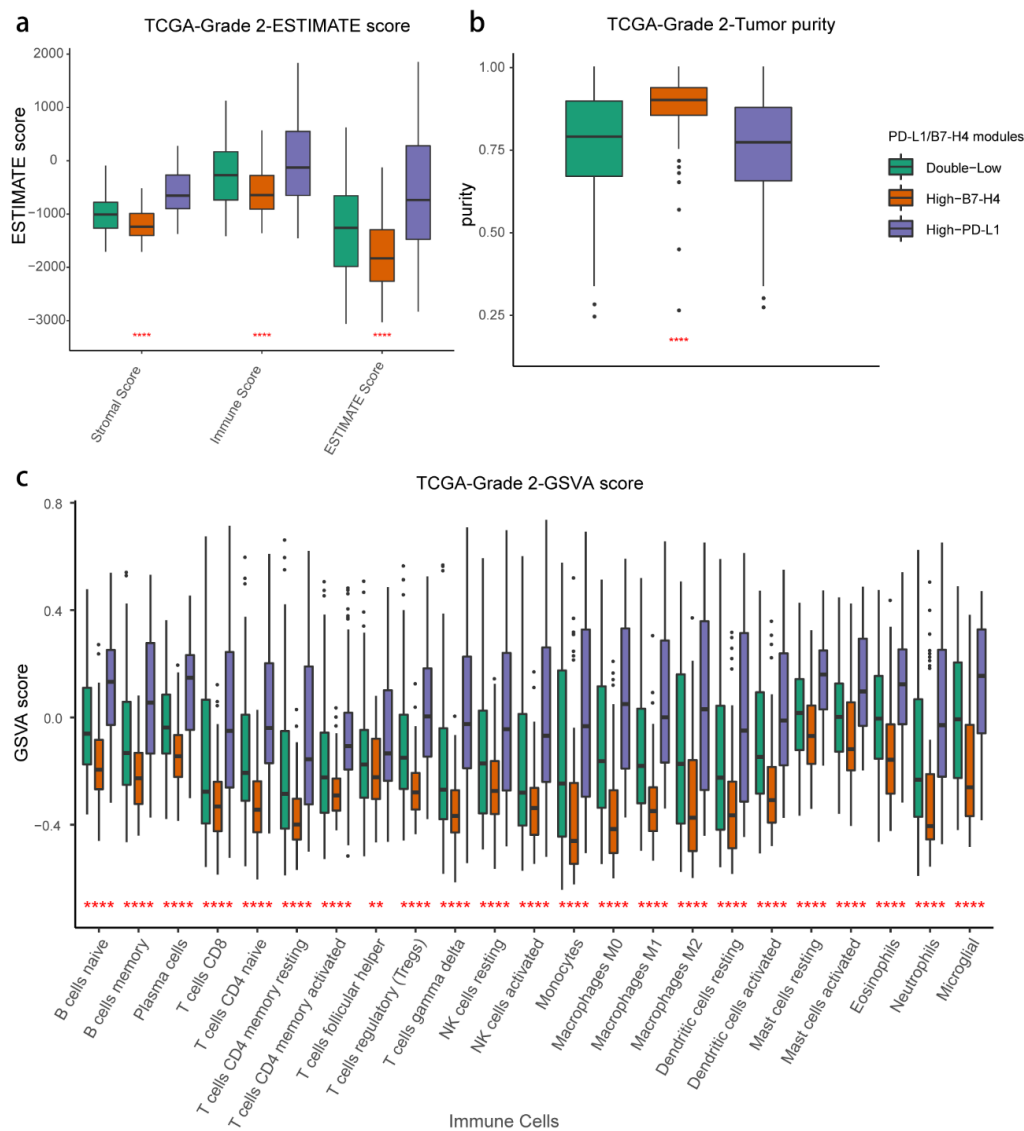

**Fig. S13.** Assessment of tumor immune microenvironment among PD-L1/B7-H4 modules in grade 2 gliomas from TCGA dataset. ESTIMATE evaluation showed less immune infiltration in High-B7-H4 module (a). High-B7-H4 module gliomas showed higher tumor purity (b). Comparison of GSVA score representing extent of immune cells infiltration among modules demonstrated lacking immune cells in High-B7-H4 modules (c).

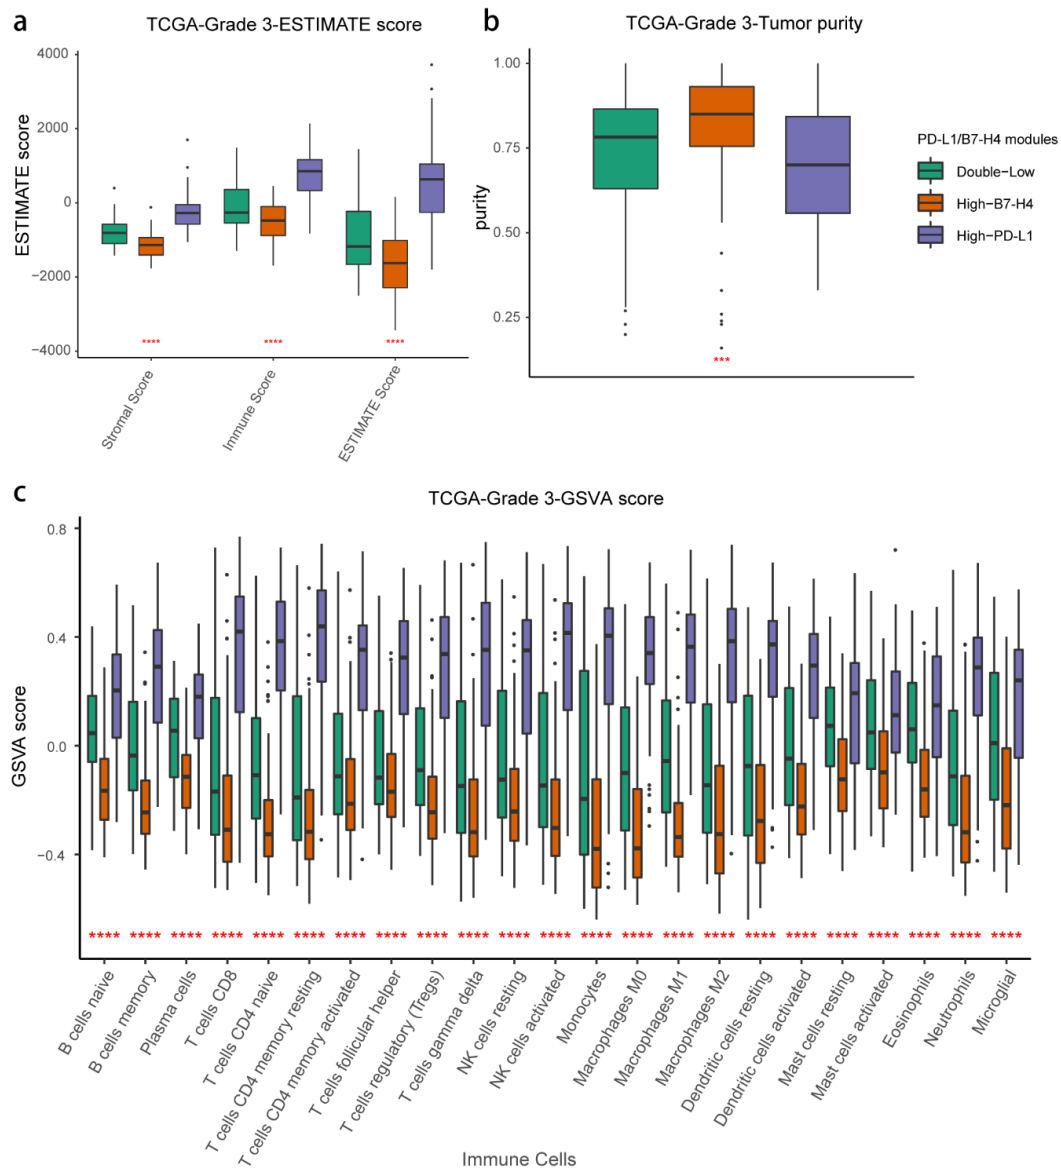

**Fig. S14.** Assessment of tumor immune microenvironment among PD-L1/B7-H4 modules in grade 3 gliomas from TCGA dataset. ESTIMATE evaluation showed less immune infiltration in High-B7-H4 module (a). High-B7-H4 module gliomas showed higher tumor purity (b). Comparison of GSVA score representing extent of immune cells infiltration among modules demonstrated lacking immune cells in High-B7-H4 modules (c).

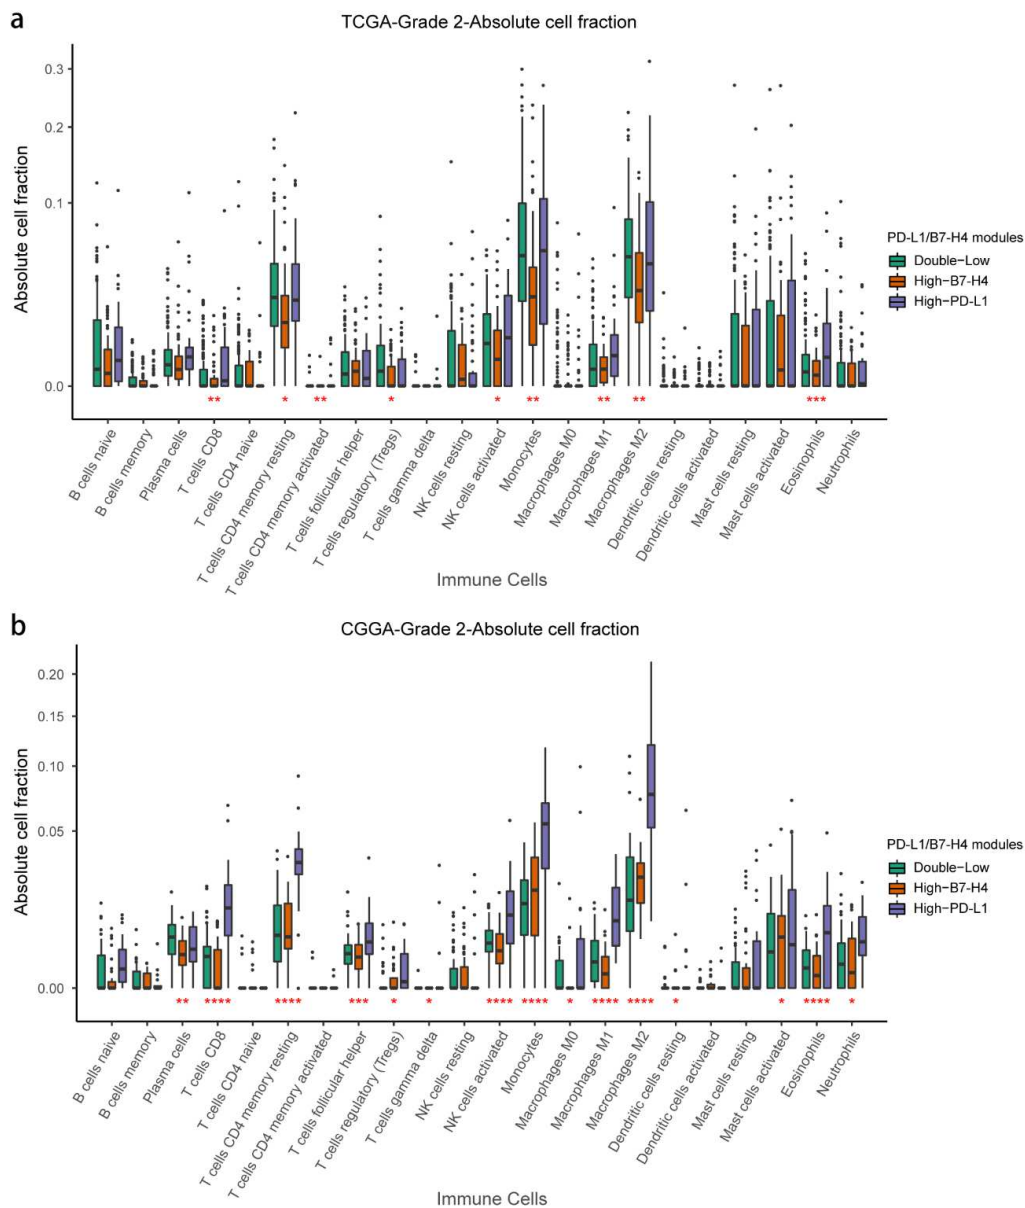

**Fig. S15.** Absolute immune cell fractions for 22 immune cell populations differed among PD-L1/B7-H4 modules in grade 2 gliomas. Grade 2 gliomas from TCGA dataset **(a)**. Grade 2 gliomas from CGGA dataset **(b)**.



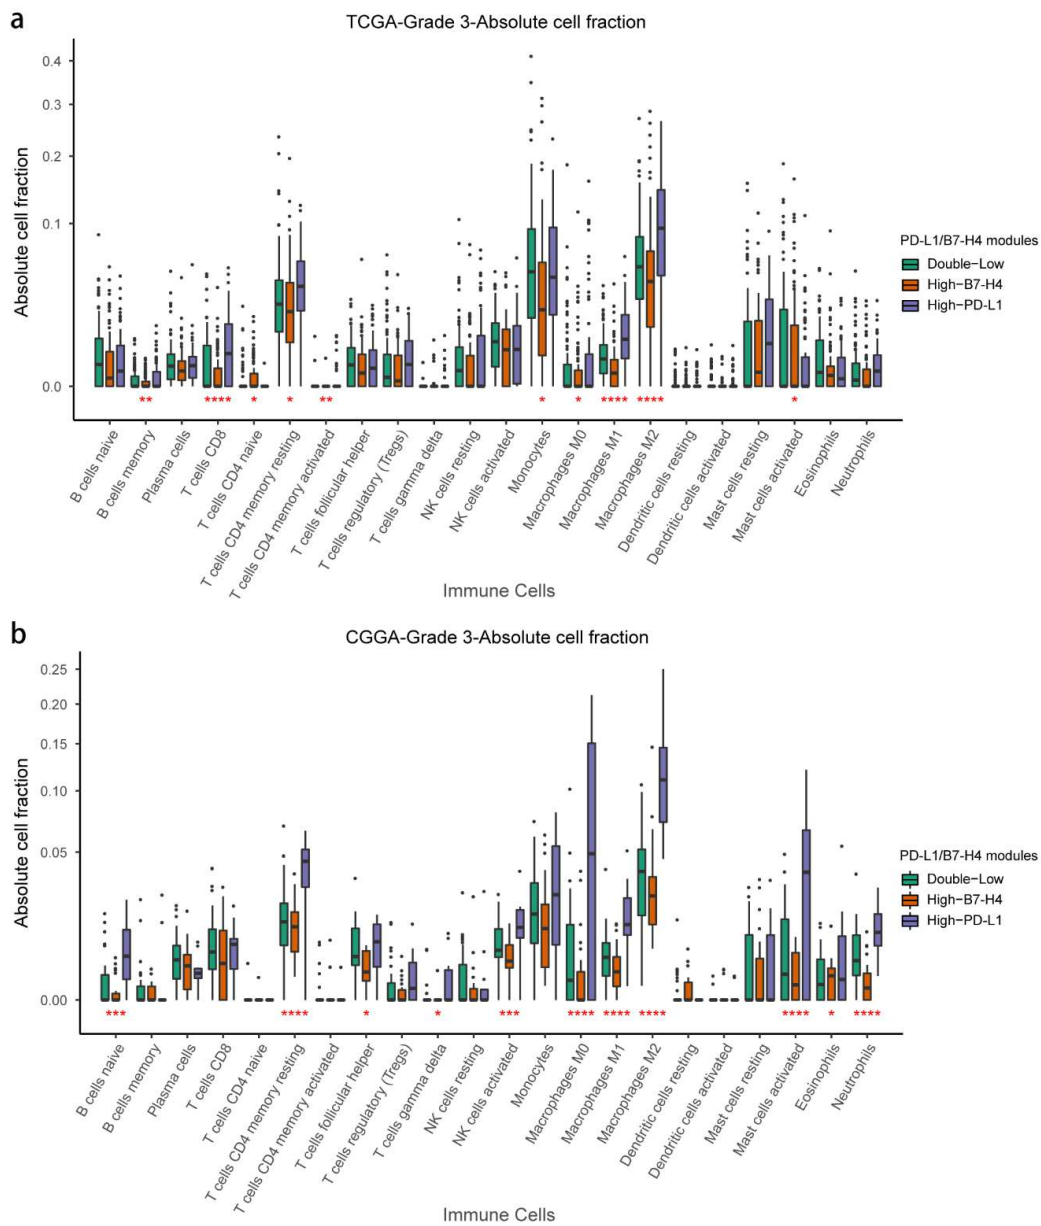

**Fig. S16.** Absolute immune cell fractions for 22 immune cell populations differed among PD-L1/B7-H4 modules in grade 3 gliomas. Grade 3 gliomas from TCGA dataset **(a)**. Grade 3 gliomas from CGGA dataset **(b)**.

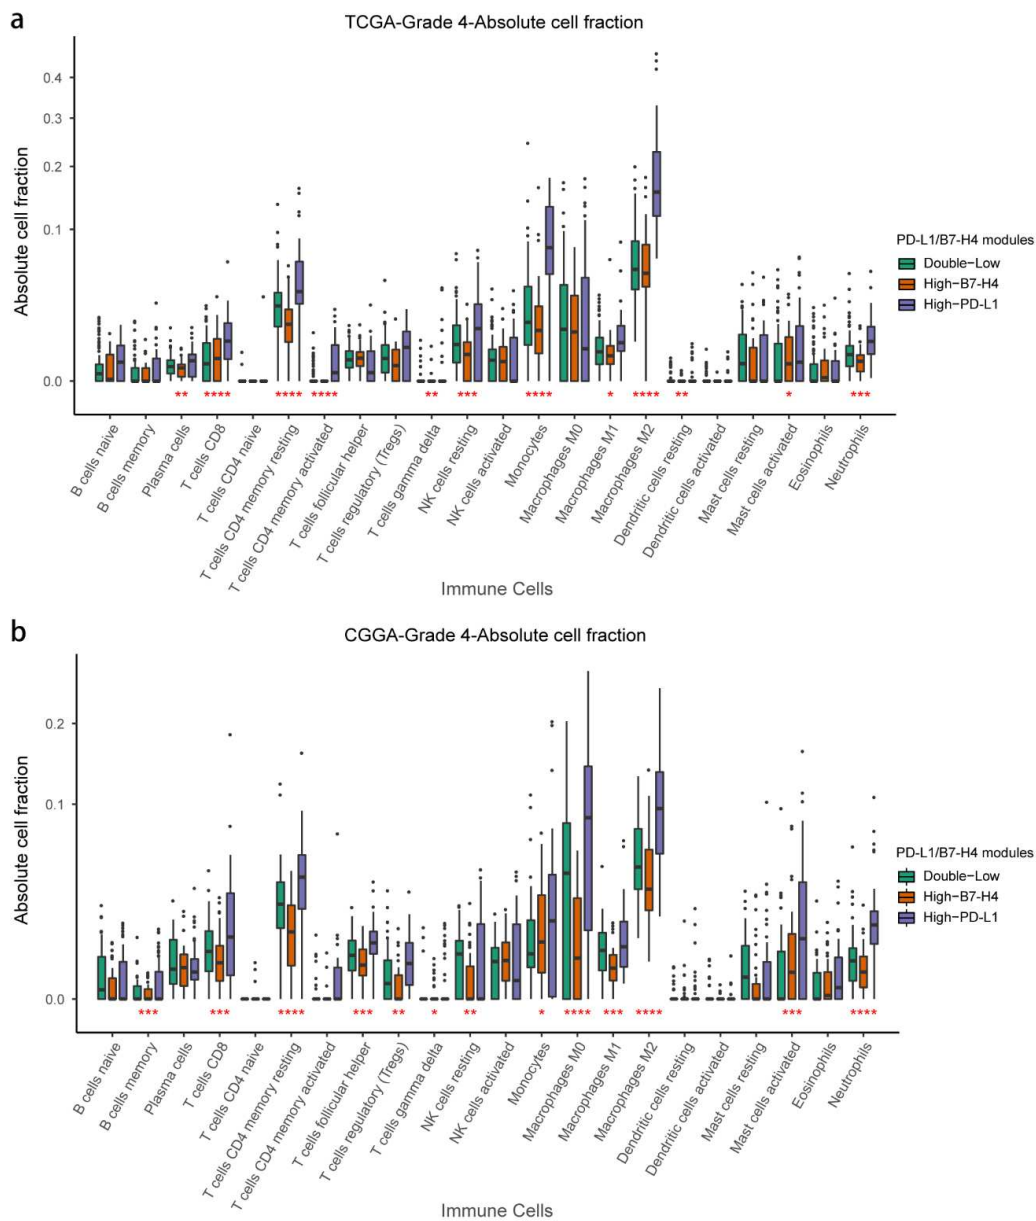

**Fig. S17.** Absolute immune cell fractions for 22 immune cell populations differed among PD-L1/B7-H4 modules in grade4 gliomas. Grade 4 gliomas from TCGA dataset **(a)**. Grade 4 gliomas from CGGA dataset **(b)**.

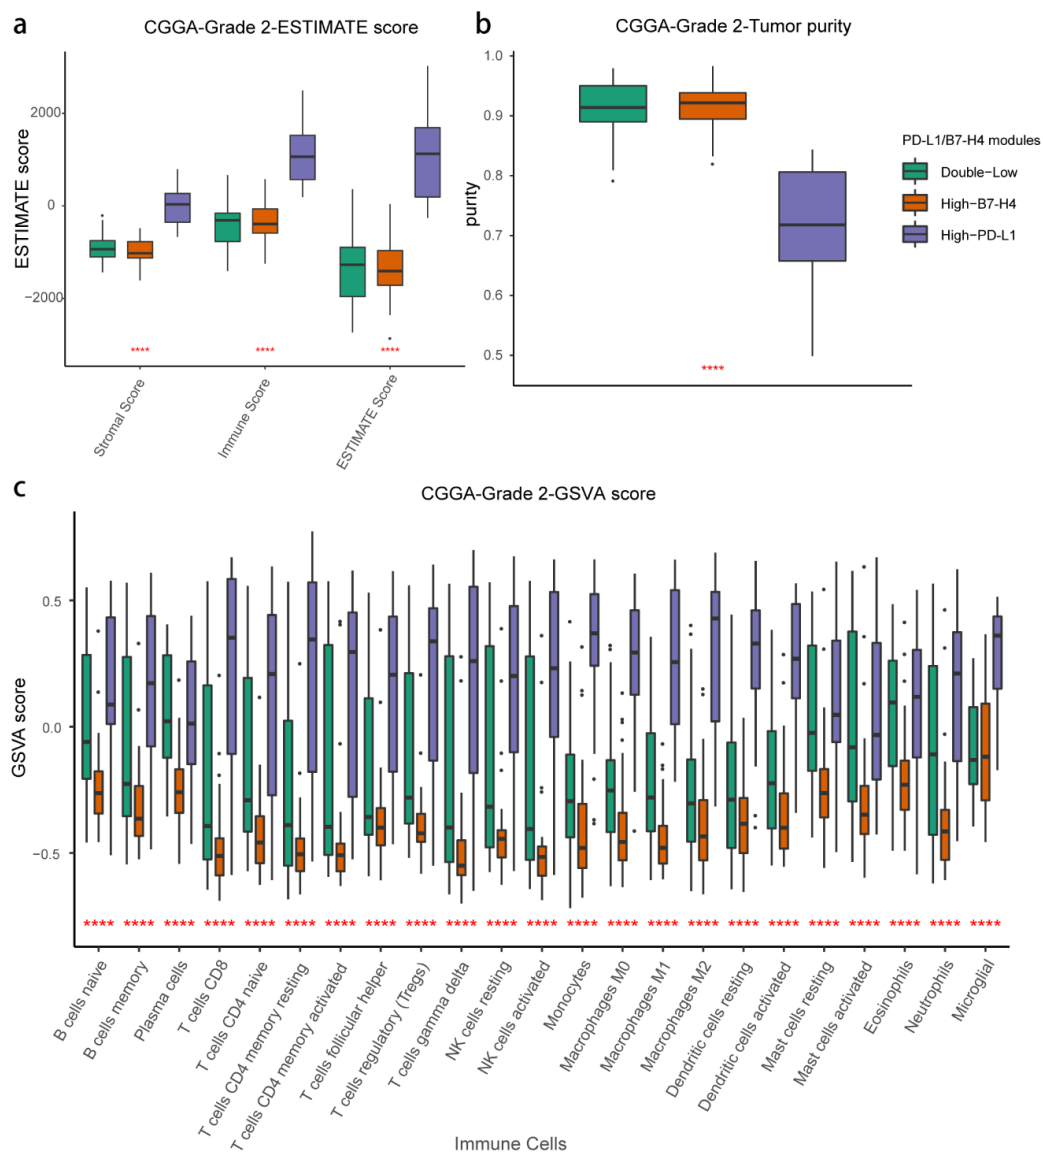

**Fig. S18.** Assessment of tumor immune microenvironment among PD-L1/B7-H4 modules in grade 2 gliomas from CGGA dataset. ESTIMATE evaluation showed less immune infiltration in High-B7-H4 module (a). High-B7-H4 module gliomas showed higher tumor purity (b). Comparison of GSVA score representing extent of immune cells infiltration among modules demonstrated lacking immune cells in High-B7-H4 modules (c).

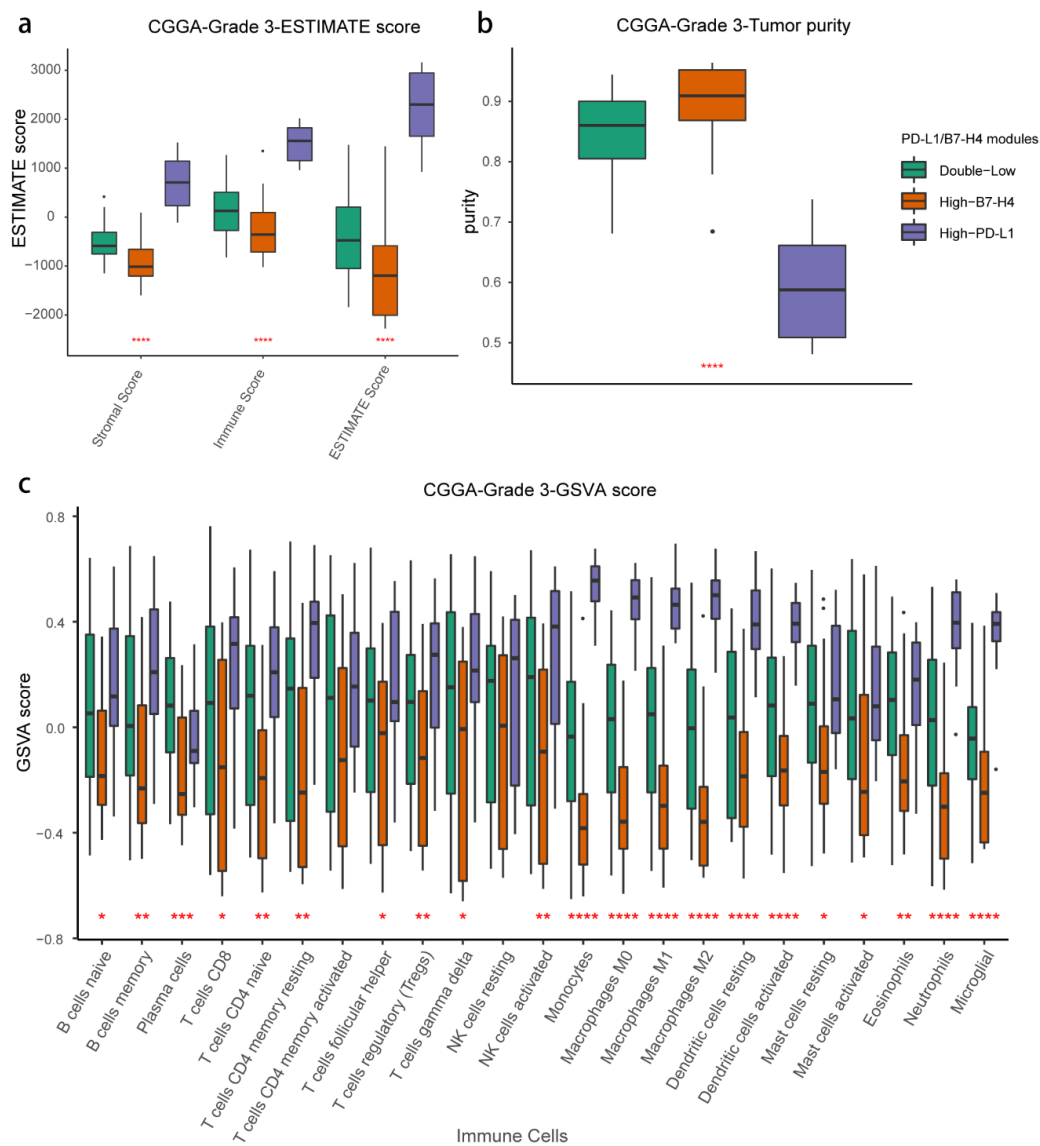

**Fig. S19.** Assessment of tumor immune microenvironment among PD-L1/B7-H4 modules in grade 3 gliomas from CGGA dataset. ESTIMATE evaluation showed less immune infiltration in High-B7-H4 module (**a**). High-B7-H4 module gliomas showed higher tumor purity (**b**). Comparison of GSVA score representing extent of immune cells infiltration among modules demonstrated lacking immune cells in High-B7-H4 modules (**c**).

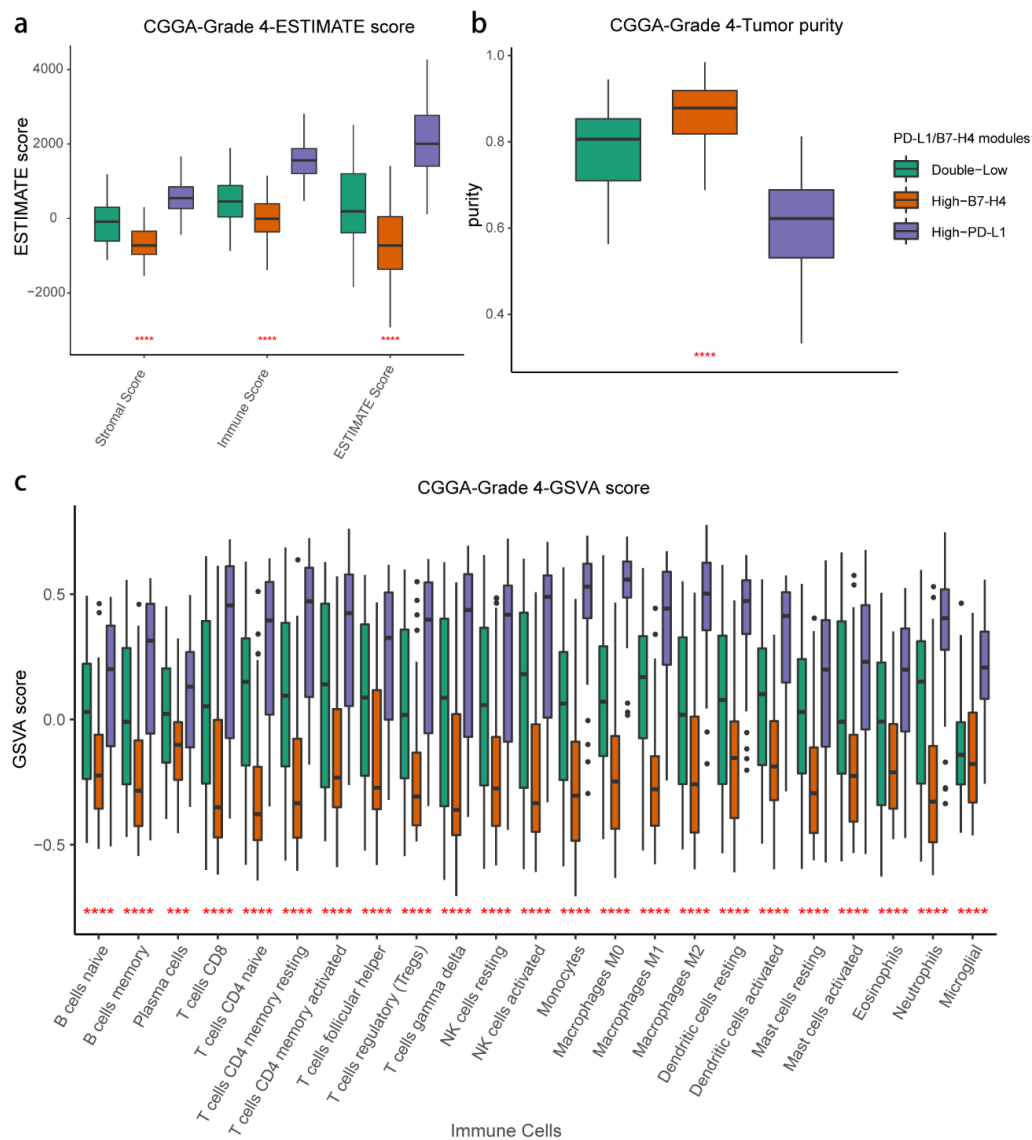

**Fig. S20.** Assessment of tumor immune microenvironment among PD-L1/B7-H4 modules in grade 4 gliomas from CGGA dataset. ESTIMATE evaluation showed less immune infiltration in High-B7-H4 module (a). High-B7-H4 module gliomas showed higher tumor purity (b). Comparison of GSVAscores representing extent of immune cells infiltration among modules demonstrated lacking immune cells in High-B7-H4 modules (c).

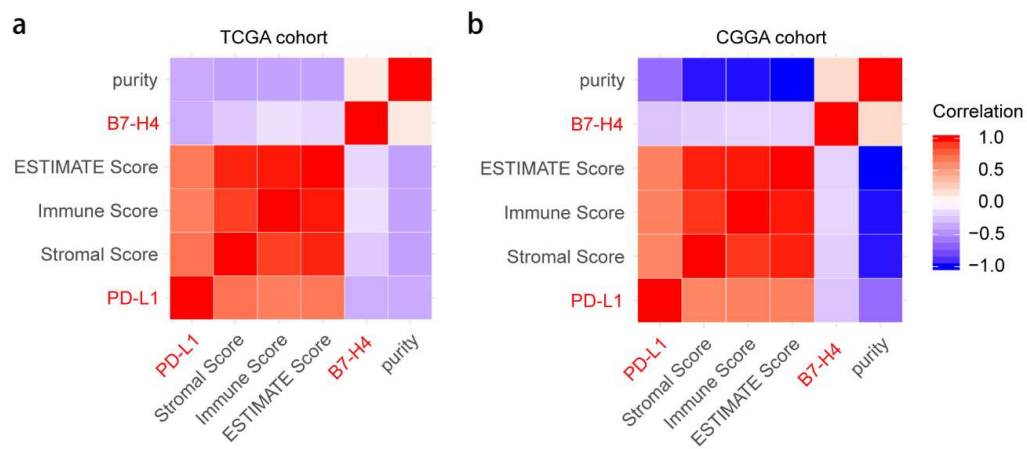

**Fig. S21.** Correlation analysis among checkpoint molecules and characteristics of immune microenvironment in two RNA-seq datasets showed negative correlation between B7-H4 and extent of immune cell infiltration. The whole cohort from TCGA dataset (**a**). The whole cohort from CGGA dataset (**b**).

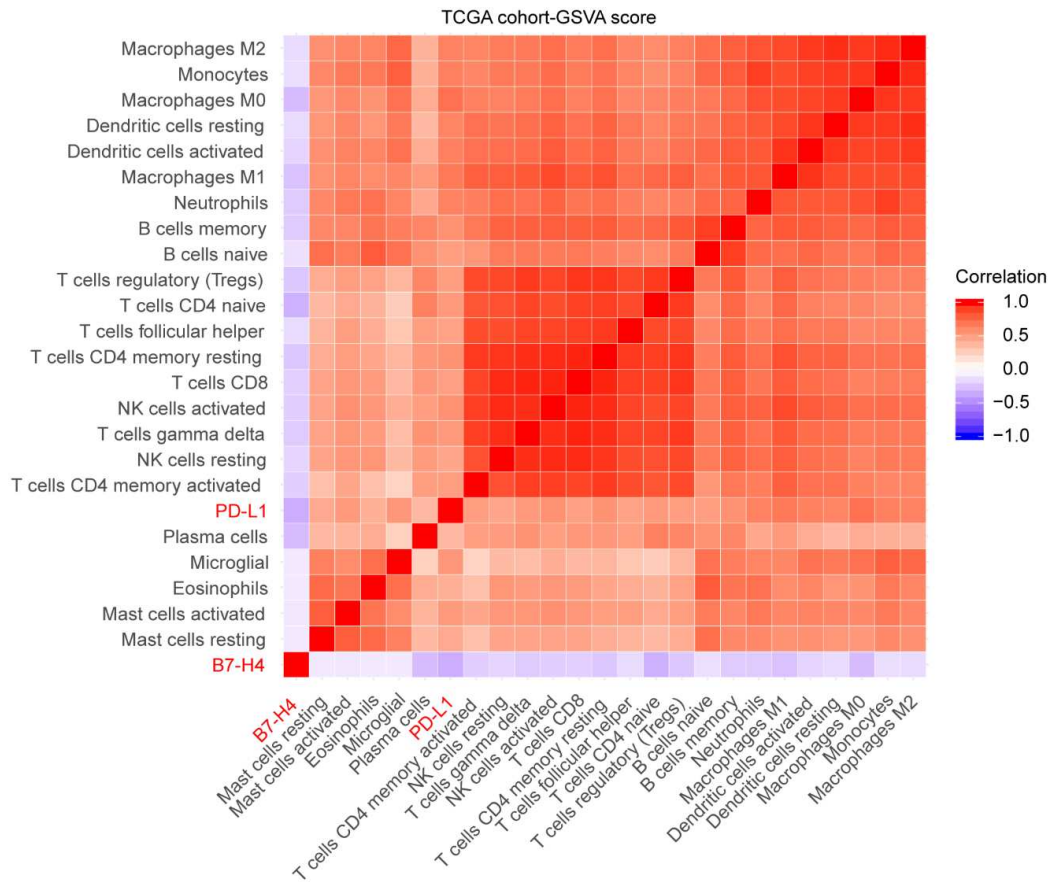

**Fig. S22.** Correlation analysis among checkpoint molecules and GSVA scores representing the extent of immune cell infiltration in the whole cohort from TCGA dataset showed negative correlation between B7-H4 and extent of immune cell infiltration.

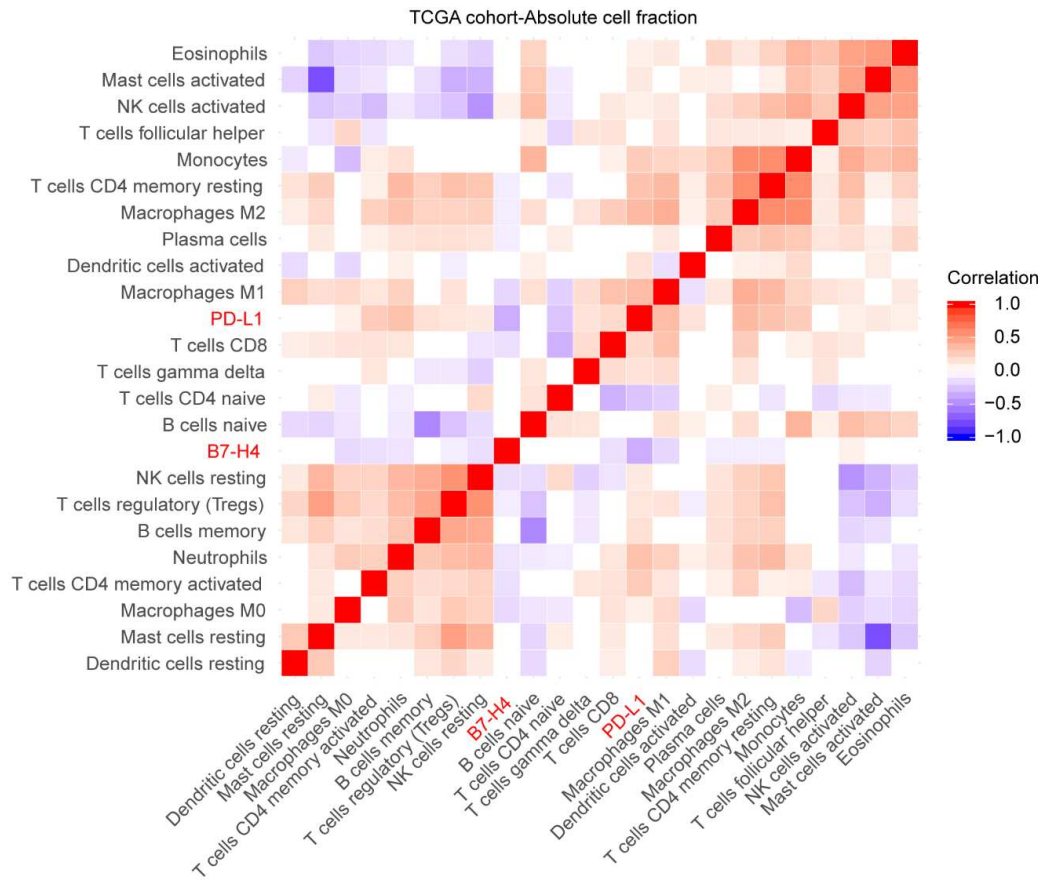

**Fig. S23.** Correlation analysis among checkpoint molecules and absolute immune cell fractions in the whole cohort from TCGA dataset showed negative correlation between B7-H4 and extent of immune cell infiltration.



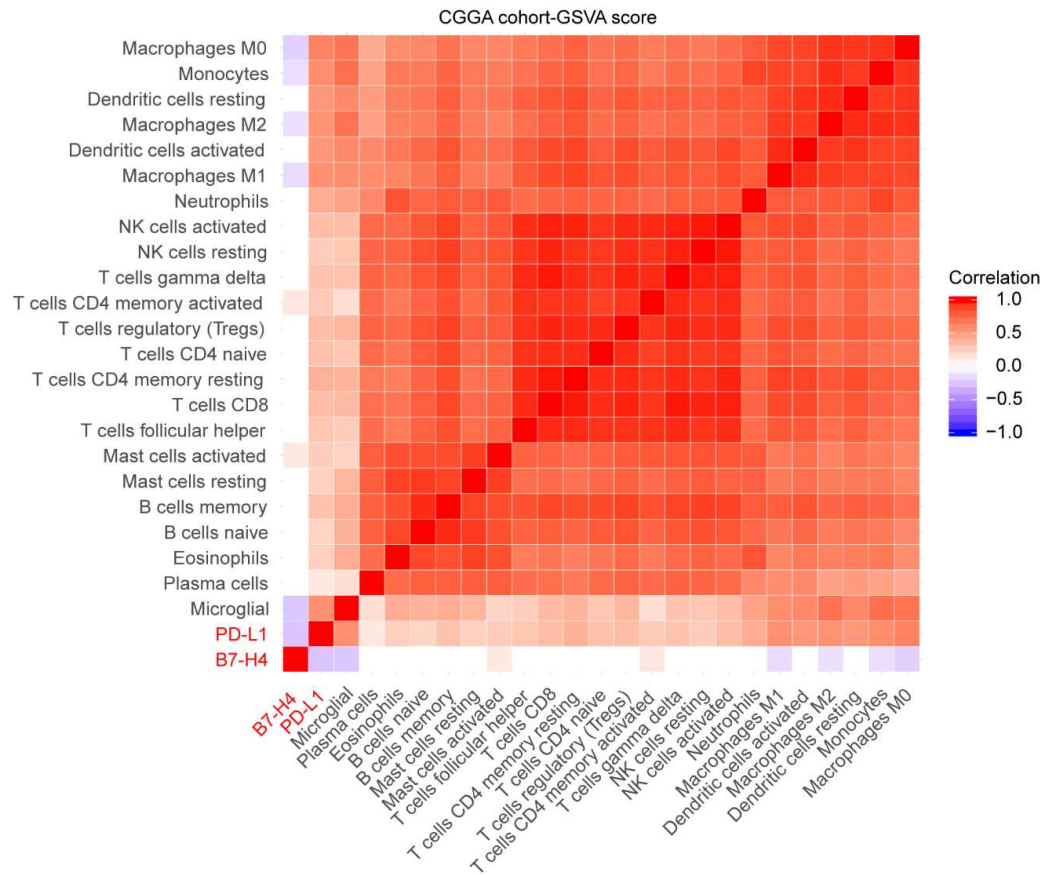

**Fig. S24.** Correlation analysis among checkpoint molecules and GSVA scores representing the extent of immune cell infiltration in the whole cohort from CGGA dataset showed negative correlation between B7-H4 and extent of immune cell infiltration.

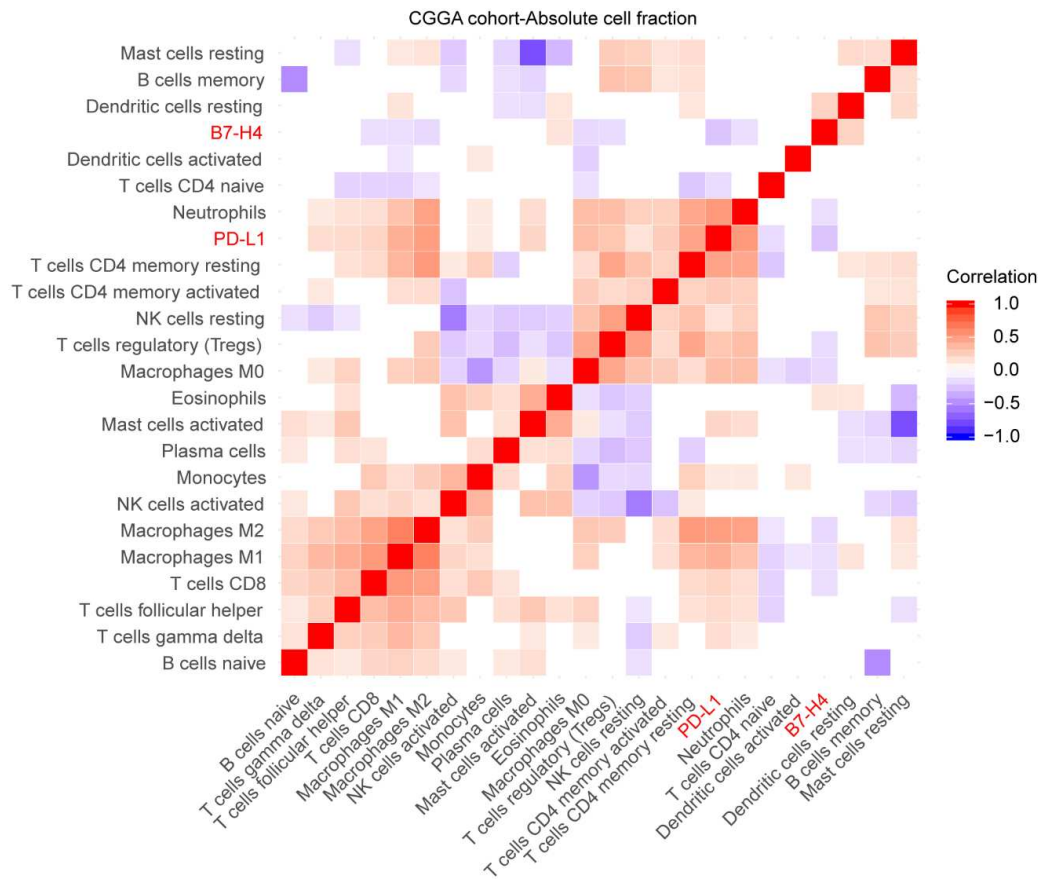

**Fig. S25.** Correlation analysis among checkpoint molecules and absolute immune cell fractions in the whole cohort from CGGA dataset showed negative correlation between B7-H4 and extent of immune cell infiltration.

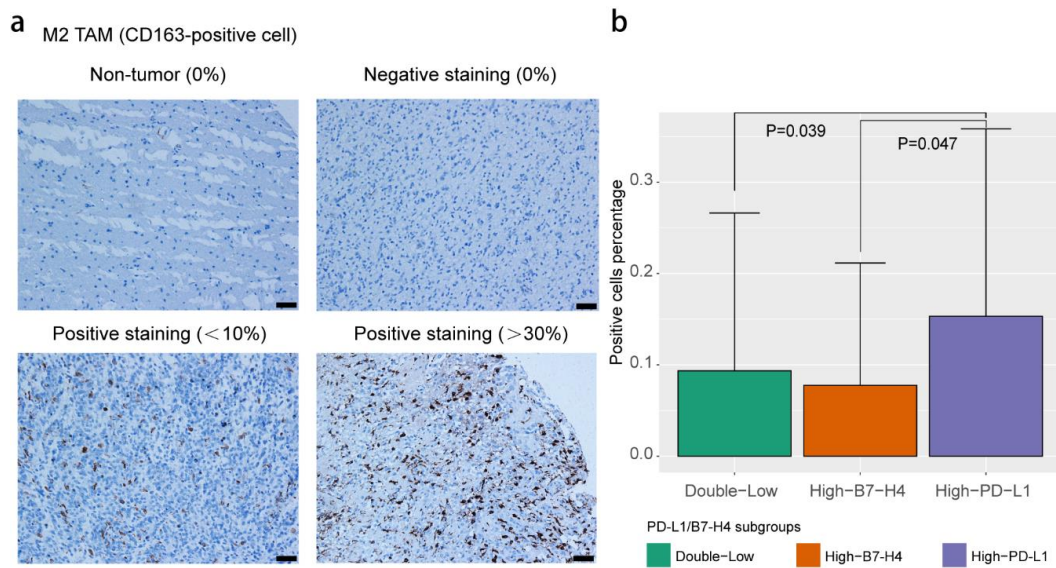

**Fig. S26.** Difference in TAM (CD163 positive cell) density among PD-L1/B7-H4 subgroup gliomas in TMA cores. Representative examples of TAM infiltration in different extents (**a**). Comparison of positive proportions for CD163 showed High-B7-H4 subgroup gliomas had less TAM infiltration than High-PD-L1 subgroup gliomas (**b**). Magnification, 20x objective; Bar, 50um.

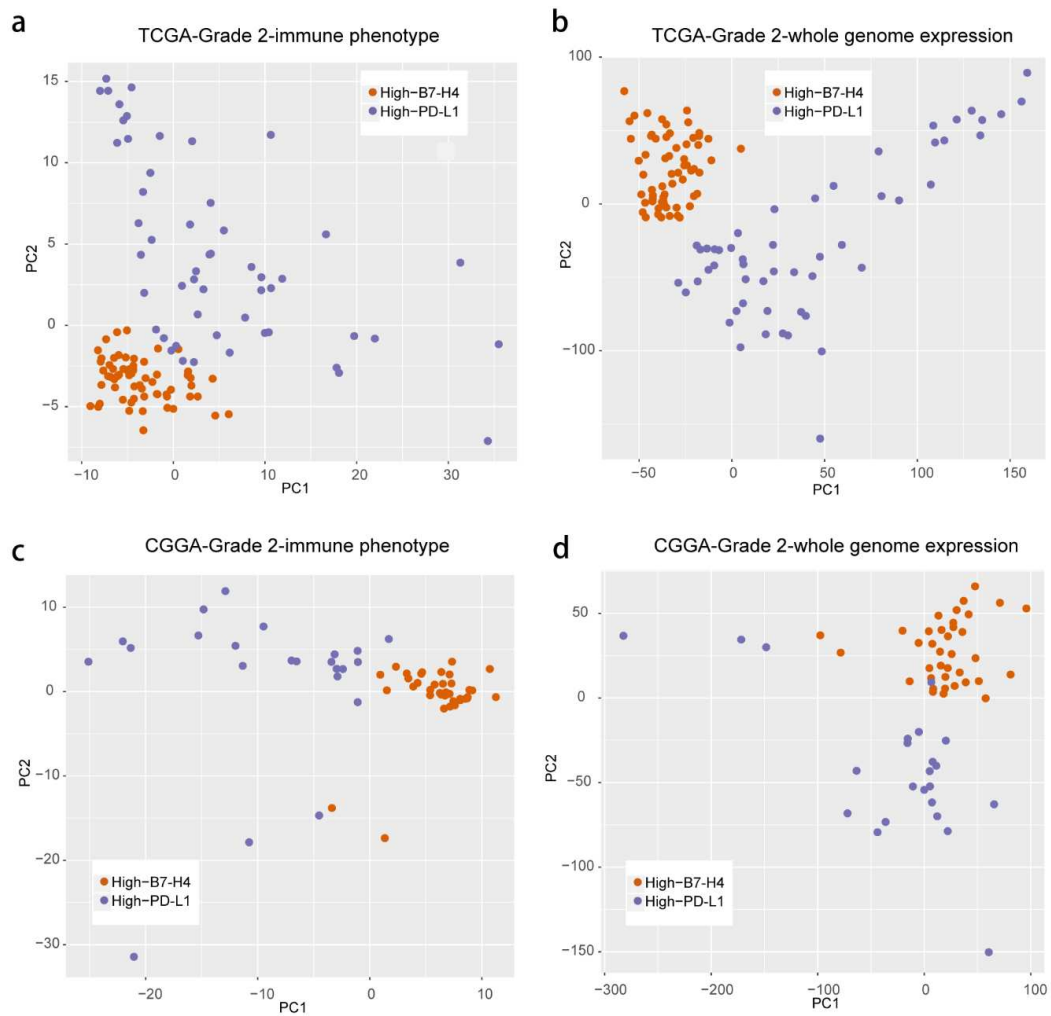

**Fig. S27.** Principal component analysis between High-PD-L1 and High-B7-H4 modules verified distinct immune phenotypes and whole genome expression profile in grade2 gliomas. Immune phenotype in grade 2 gliomas from TCGA dataset (**a**). Whole genome expression profile in grade 2 gliomas from TCGA dataset (**b**). Immune phenotype in grade 2 gliomas from CGGA dataset (**c**). Whole genome expression profile in grade 2 gliomas from CGGA dataset (**d**).

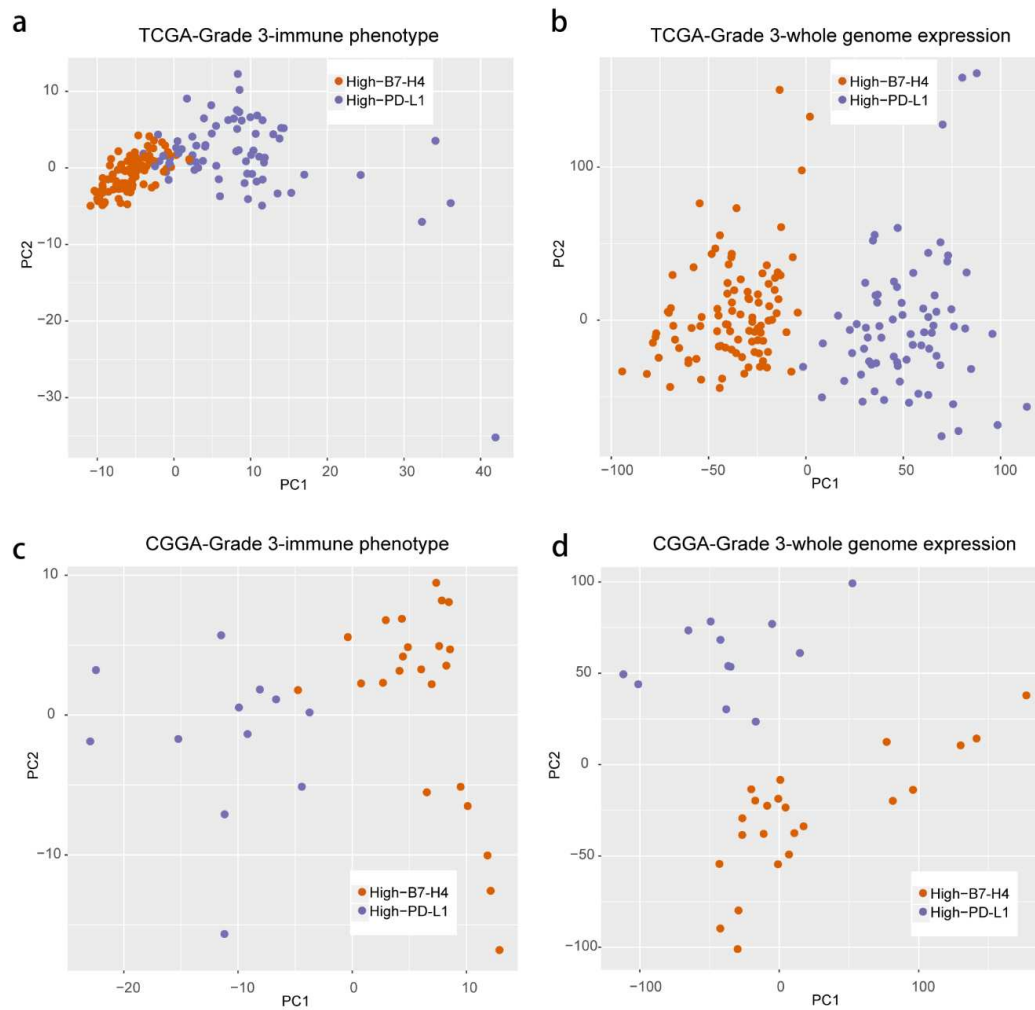

**Fig. S28.** Principal component analysis between High-PD-L1 and High-B7-H4 modules verified distinct immune phenotypes and whole genome expression profile in grade3 gliomas. Immune phenotype in grade 3 gliomas from TCGA dataset **(a)**. Whole genome expression profile in grade 3 gliomas from TCGA dataset **(b)**. Immune phenotype in grade 3 gliomas from CGGA dataset **(c)**. Whole genome expression profile in grade 3 gliomas from CGGA dataset **(d)**.

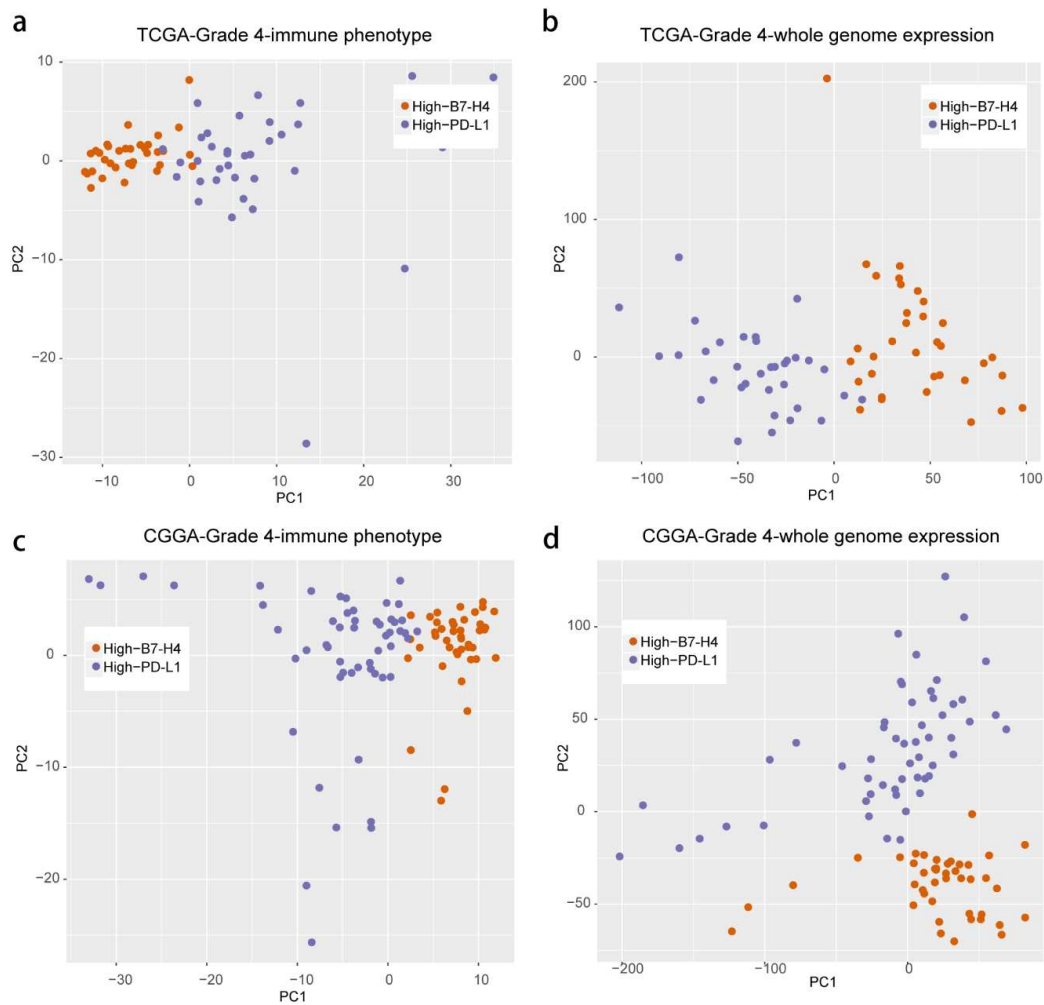

**Fig. S29.** Principal component analysis between High-PD-L1 and High-B7-H4 modules verified distinct immune phenotypes and whole genome expression profile in grade4 gliomas. Immune phenotype in grade 4 gliomas from TCGA dataset **(a)**. Whole genome expression profile in grade 4 gliomas from TCGA dataset **(b)**. Immune phenotype in grade 4 gliomas from CGGA dataset **(c)**. Whole genome expression profile in grade 4 gliomas from CGGA dataset **(d)**.

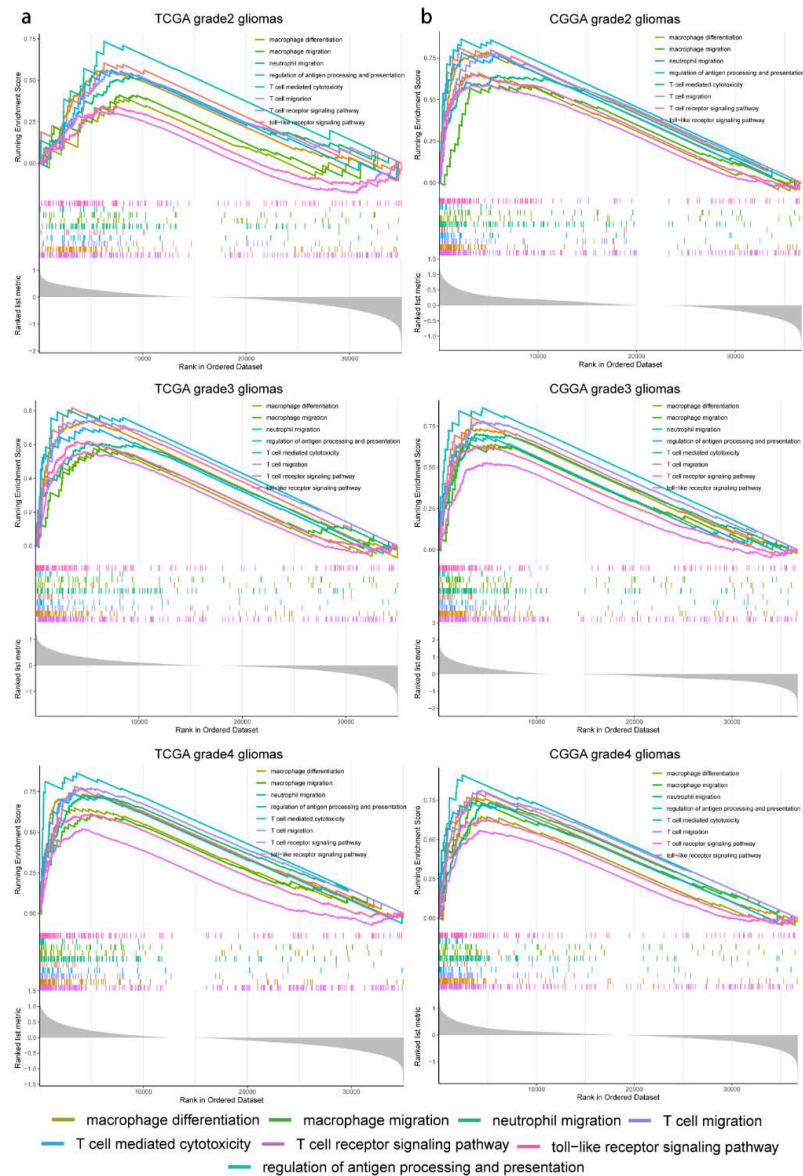

**Fig. S30.** GSEA analysis between High-PD-L1 and High-B7-H4 modules in each glioma grade verified High-PD-L1 module gliomas were equipped with greater immune responses. Representative GSEA results within each glioma grade in TCGA dataset (**a**). Representative GSEA results within each glioma grade in CGGA dataset (**b**). All of the biological processes presented here were significant difference ( $P < 0.01$ ).

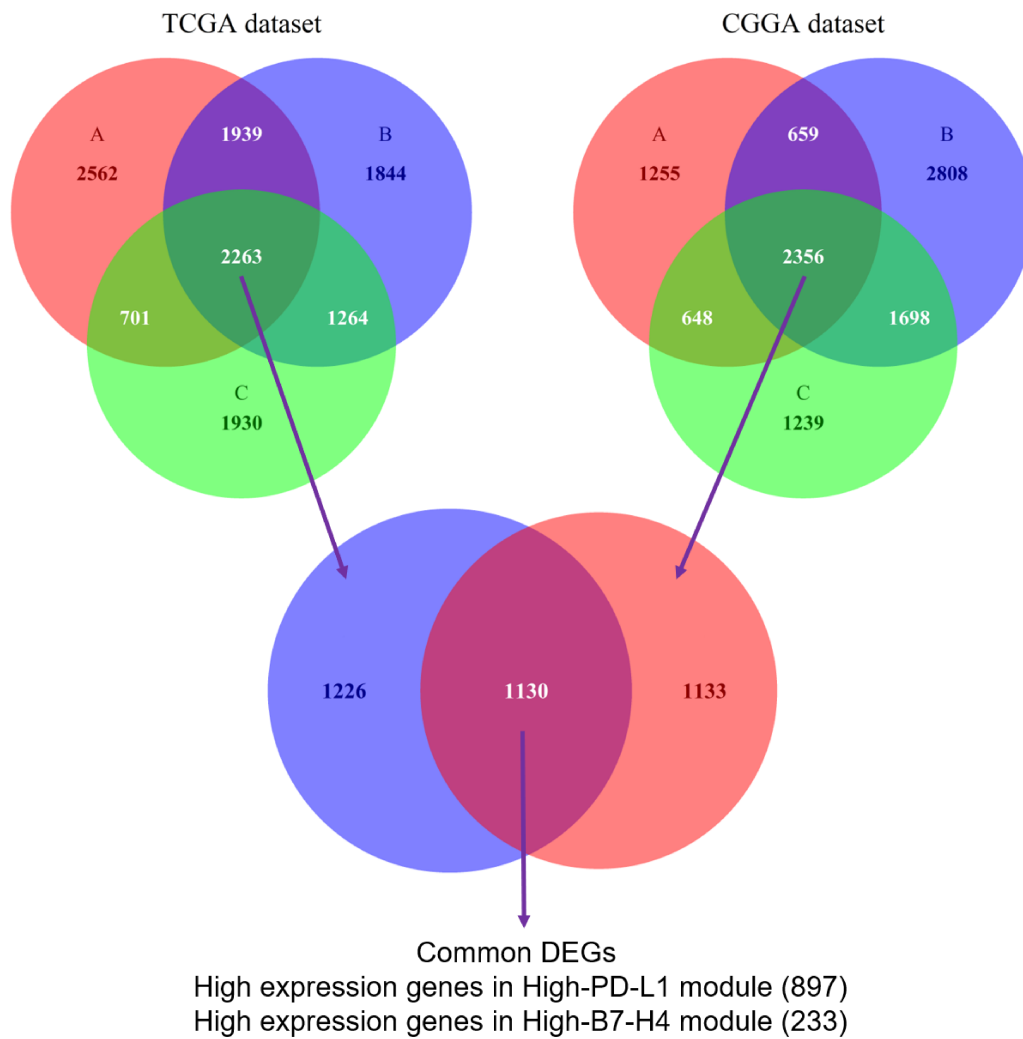

**Fig. S31.** Differentially expressed genes were obtained in each glioma grade from two datasets between High-PD-L1 module and High-B7-H4 module with DESeq2 package. Grade2 gliomas (A), Grade3 gliomas (B), Grade4 gliomas (C).



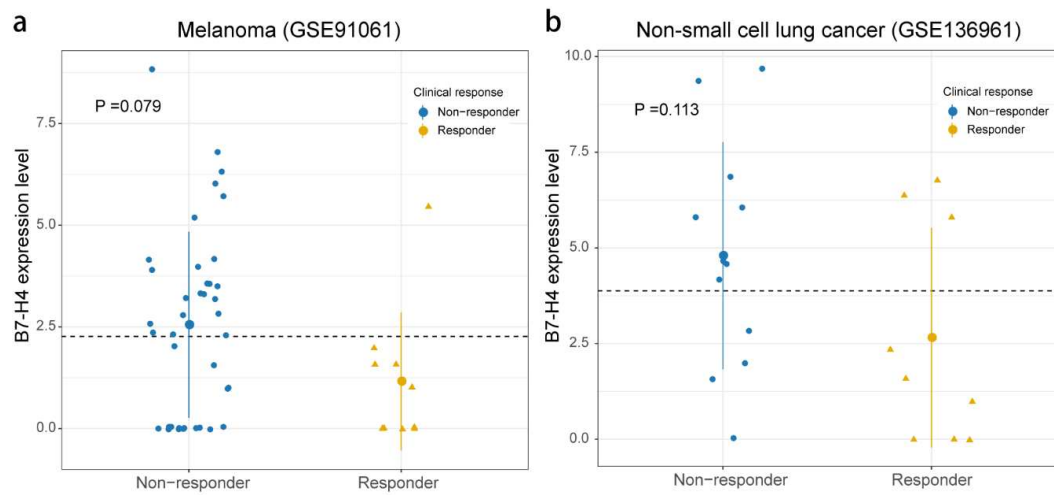

**Fig. S32.** Correlation between B7-H4 and survival of solid tumor patients treated with anti-PD-1 antibodies immunotherapy. Comparison of B7-H4 mRNA expression level between responders and non-responders treated with anti-PD-1 antibody in melanoma (**a, n=49**) and non-small cell lung cancer (**b, n=21**) using RNA-seq data.

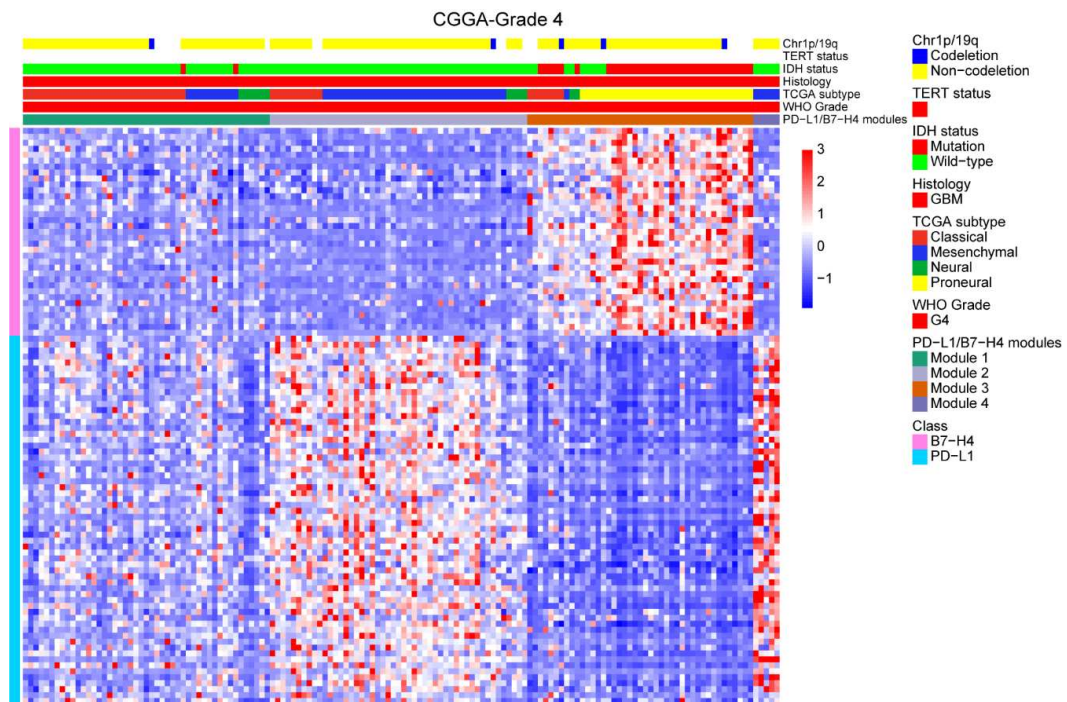

**Fig. S33.** Gene co-expression modules in the grade 4 gliomas from CGGA dataset showed mutually exclusive expression profiles. The module2 and module 4 were recombined into the High-PD-L1 module.
